# Supplementary material for: Disentangling leaf-microbiome interactions in Arabidopsis thaliana by network mapping
Source: Front Plant Sci. 2022 Oct 6;13:996121. doi: 10.3389/fpls.2022.996121 (PMC9583167; doi:10.3389/fpls.2022.996121)
Supplement: Supplementary file 6 [file Table_6.XLSX]

## Sheet: SU_2012
Supplemental Table 6 The list of significant SNPs in SU in 2012
NUM	CHR	Position	ENV	gene_name
1	2	16816755	ull_agg_con_2012	AT2G40260
2	3	7411182	ull_agg_con_2012	AT3G21140
3	3	9992597	ull_agg_con_2012	AT3G27095
4	3	9990124	ull_agg_con_2012	AT3G27090
5	4	5249599	ull_agg_con_2012	AT4G08310
6	4	5254627	ull_agg_con_2012	TPR8
7	4	5258619	ull_agg_con_2012	AT4G08333
8	4	5262482	ull_agg_con_2012	AT4G08336
9	4	5263638	ull_agg_con_2012	-
10	3	9993132	ull_agg_con_2012	AT3G27095
11	4	5260099	ull_agg_con_2012	AT4G08333
12	1	22326727	ull_agg_cu_2012	ABC4
13	4	7222658	ull_agg_cu_2012	-
14	4	10032506	ull_agg_cu_2012	AT4G18070
15	4	10034155	ull_agg_cu_2012	AT4G18090
16	4	10048449	ull_agg_cu_2012	SSP4b
17	4	10049509	ull_agg_cu_2012	-
18	4	10050361	ull_agg_cu_2012	AT4G18150
19	4	10091775	ull_agg_cu_2012	AT4G18253
20	4	10096542	ull_agg_cu_2012	AT4G18260
21	4	10100333	ull_agg_cu_2012	TRANS11
22	4	10035462	ull_agg_cu_2012	AT4G18100
23	4	10053604	ull_agg_cu_2012	AT4G18150
24	4	10052593	ull_agg_cu_2012	AT4G18150
25	2	6965458	ull_agg_bu_2012	-
26	2	6964326	ull_agg_bu_2012	-
27	2	6964858	ull_agg_bu_2012	-
28	2	6972836	ull_agg_bu_2012	AT2G16018
29	2	6971403	ull_agg_bu_2012	AT2G06535
30	2	6971583	ull_agg_bu_2012	AT2G06535
31	2	6972344	ull_agg_bu_2012	AT2G16018
32	2	6972739	ull_agg_bu_2012	AT2G16018
33	3	8227918	ull_agg_bu_2012	RLP38
34	5	15128902	ull_agg_bu_2012	-
35	5	21560025	ull_agg_bu_2012	-
36	2	6965635	ull_agg_bu_2012	AT2G16010
37	2	6974199	ull_agg_bu_2012	AT2G16030
38	2	6974658	ull_agg_bu_2012	AT2G16030
39	2	6974796	ull_agg_bu_2012	AT2G16030
5	4	5249599	ull_agg_eu_2012	AT4G08310
6	4	5254627	ull_agg_eu_2012	TPR8
7	4	5258619	ull_agg_eu_2012	AT4G08333
9	4	5263638	ull_agg_eu_2012	-
40	5	18304934	ull_agg_eu_2012	AT5G45230
11	4	5260099	ull_agg_eu_2012	AT4G08333
41	1	11444514	ull_agg_gu_2012	-
13	4	7222658	ull_agg_gu_2012	-
14	4	10032506	ull_agg_gu_2012	AT4G18070
15	4	10034155	ull_agg_gu_2012	AT4G18090
16	4	10048449	ull_agg_gu_2012	SSP4b
17	4	10049509	ull_agg_gu_2012	-
18	4	10050361	ull_agg_gu_2012	AT4G18150
19	4	10091775	ull_agg_gu_2012	AT4G18253
20	4	10096542	ull_agg_gu_2012	AT4G18260
22	4	10035462	ull_agg_gu_2012	AT4G18100
23	4	10053604	ull_agg_gu_2012	AT4G18150
24	4	10052593	ull_agg_gu_2012	AT4G18150
13	4	7222658	ull_alt_cu_2012	-
14	4	10032506	ull_alt_cu_2012	AT4G18070
15	4	10034155	ull_alt_cu_2012	AT4G18090
16	4	10048449	ull_alt_cu_2012	SSP4b
17	4	10049509	ull_alt_cu_2012	-
19	4	10091775	ull_alt_cu_2012	AT4G18253
20	4	10096542	ull_alt_cu_2012	AT4G18260
21	4	10100333	ull_alt_cu_2012	TRANS11
22	4	10035462	ull_alt_cu_2012	AT4G18100
23	4	10053604	ull_alt_cu_2012	AT4G18150
42	2	6936157	ull_alt_bu_2012	AT2G15920
43	2	6945389	ull_alt_bu_2012	-
44	2	6952651	ull_alt_bu_2012	AT2G15980
28	2	6972836	ull_alt_bu_2012	AT2G16018
29	2	6971403	ull_alt_bu_2012	AT2G06535
30	2	6971583	ull_alt_bu_2012	AT2G06535
31	2	6972344	ull_alt_bu_2012	AT2G16018
32	2	6972739	ull_alt_bu_2012	AT2G16018
45	2	16737080	ull_alt_bu_2012	AT2G40085
46	3	11113111	ull_alt_bu_2012	-
47	4	1824114	ull_alt_bu_2012	AT4G03876
13	4	7222658	ull_alt_bu_2012	-
48	4	13325803	ull_alt_bu_2012	-
49	4	13337935	ull_alt_bu_2012	-
50	4	13452730	ull_alt_bu_2012	AT4G26670
51	4	13464927	ull_alt_bu_2012	FIM1
52	4	13468854	ull_alt_bu_2012	AT4G26710
53	4	13492556	ull_alt_bu_2012	AT4G26810
54	4	13500020	ull_alt_bu_2012	VTC2
55	4	13505235	ull_alt_bu_2012	-
56	2	6936878	ull_alt_bu_2012	AT2G15920
57	2	6945793	ull_alt_bu_2012	-
58	2	6953135	ull_alt_bu_2012	-
37	2	6974199	ull_alt_bu_2012	AT2G16030
38	2	6974658	ull_alt_bu_2012	AT2G16030
39	2	6974796	ull_alt_bu_2012	AT2G16030
59	2	16738852	ull_alt_bu_2012	ATH9
60	1	25968797	ull_alt_eu_2012	AT1G69070
61	2	14657572	ull_alt_eu_2012	AT2G34730
62	5	15047190	ull_alt_eu_2012	NIP4;1
63	5	15942230	ull_alt_eu_2012	-
41	1	11444514	ull_alt_gu_2012	-
64	3	1868488	ull_alt_gu_2012	AT3G06170
13	4	7222658	ull_alt_gu_2012	-
14	4	10032506	ull_alt_gu_2012	AT4G18070
15	4	10034155	ull_alt_gu_2012	AT4G18090
16	4	10048449	ull_alt_gu_2012	SSP4b
17	4	10049509	ull_alt_gu_2012	-
18	4	10050361	ull_alt_gu_2012	AT4G18150
20	4	10096542	ull_alt_gu_2012	AT4G18260
21	4	10100333	ull_alt_gu_2012	TRANS11
22	4	10035462	ull_alt_gu_2012	AT4G18100
23	4	10053604	ull_alt_gu_2012	AT4G18150
24	4	10052593	ull_alt_gu_2012	AT4G18150
65	1	20090363	ull_anta_bu_2012	AT1G53815
66	2	17663484	ull_anta_bu_2012	LBD16
67	2	17681321	ull_anta_bu_2012	AT2G42465
68	2	17664317	ull_anta_bu_2012	LBD16
69	1	19887249	ull_anta_eu_2012	PPC1
70	2	7939937	ull_anta_gu_2012	COAD
71	2	7944306	ull_anta_gu_2012	-
72	1	438106	ull_mutu_con_2012	NAC005
73	1	3566085	ull_mutu_con_2012	AT1G10730
74	3	7886932	ull_mutu_con_2012	-
75	3	9014171	ull_mutu_con_2012	AT3G24675
76	3	13952054	ull_mutu_con_2012	AT3G33142
77	3	15685058	ull_mutu_con_2012	-
78	5	8232146	ull_mutu_con_2012	AT5G24240
79	3	15689207	ull_mutu_con_2012	-
80	1	802259	ull_mutu_bu_2012	AT1G03270
81	1	797241	ull_mutu_bu_2012	AT1G03260
82	1	803631	ull_mutu_bu_2012	AT1G03280
83	1	812466	ull_mutu_bu_2012	AT1G03290
84	1	807780	ull_mutu_bu_2012	AT1G03290
73	1	3566085	ull_mutu_bu_2012	AT1G10730
75	3	9014171	ull_mutu_bu_2012	AT3G24675
85	3	17285512	ull_mutu_bu_2012	-
86	5	24272959	ull_mutu_bu_2012	-
87	1	804120	ull_mutu_bu_2012	AT1G03280
88	1	813208	ull_mutu_bu_2012	AT1G03290
75	3	9014171	ull_mutu_eu_2012	AT3G24675
89	4	299575	ull_mutu_eu_2012	ANL2
90	5	17662395	ull_mutu_gu_2012	MYA2

## Sheet: SU_2013
Supplemental Table 6 The list of significant SNPs in SU in 2013
NUM	CHR	Position	ENV	gene_name
1194	1	5439643	ull_agg_cu_2013	AT1G15790
1195	1	5503844	ull_agg_cu_2013	Hsp70b
1196	1	5503859	ull_agg_cu_2013	Hsp70b
128	1	5510455	ull_agg_cu_2013	ADAP
129	1	5513718	ull_agg_cu_2013	TLP8
130	1	5515696	ull_agg_cu_2013	AT1G16080
1197	1	19893304	ull_agg_cu_2013	TLP7
425	2	350479	ull_agg_cu_2013	-
1198	2	1945418	ull_agg_cu_2013	-
1199	2	8147419	ull_agg_cu_2013	-
1200	3	5663560	ull_agg_cu_2013	KINESIN-13A
1201	3	6103181	ull_agg_cu_2013	AT3G17830
1202	3	8185187	ull_agg_cu_2013	-
1203	3	8880181	ull_agg_cu_2013	AT3G24450
1204	3	10890363	ull_agg_cu_2013	AT3G28870
1205	3	11759692	ull_agg_cu_2013	AT3G30122
1206	3	11919392	ull_agg_cu_2013	CYP702A8
1207	3	12721298	ull_agg_cu_2013	AT3G31359
1208	3	12733860	ull_agg_cu_2013	-
1209	3	12734488	ull_agg_cu_2013	-
1210	3	12779647	ull_agg_cu_2013	AT3G31406
1211	3	14290823	ull_agg_cu_2013	AT3G42115
1212	3	14946443	ull_agg_cu_2013	AT3G42860
1213	3	14990899	ull_agg_cu_2013	-
1214	3	15060174	ull_agg_cu_2013	-
1215	3	15066186	ull_agg_cu_2013	AT3G43060
1216	3	15075923	ull_agg_cu_2013	LCR33
1217	3	15085692	ull_agg_cu_2013	-
1218	3	15094689	ull_agg_cu_2013	AT3G43120
1219	3	15098631	ull_agg_cu_2013	AT3G43123
1220	3	15154520	ull_agg_cu_2013	AT3G43156
1221	3	15165642	ull_agg_cu_2013	-
1222	3	15178893	ull_agg_cu_2013	AT3G43180
1223	3	15616998	ull_agg_cu_2013	LTPG2
1224	3	16195425	ull_agg_cu_2013	AT3G44620
1225	3	16362987	ull_agg_cu_2013	AT3G44820
1226	3	16591372	ull_agg_cu_2013	AT3G45253
1227	3	16612449	ull_agg_cu_2013	SYP72
1228	3	17340549	ull_agg_cu_2013	AT3G47080
1229	3	17841514	ull_agg_cu_2013	-
1230	3	17842724	ull_agg_cu_2013	-
1231	3	18816641	ull_agg_cu_2013	DWF4
1232	3	18953318	ull_agg_cu_2013	RTH
1233	4	1782226	ull_agg_cu_2013	-
1234	4	1972235	ull_agg_cu_2013	AT4G04105
1235	4	1981615	ull_agg_cu_2013	AT4G04130
1236	4	1985680	ull_agg_cu_2013	AT4G04140
1237	4	1992372	ull_agg_cu_2013	AT4G04145
1238	4	2023700	ull_agg_cu_2013	AT4G04180
1239	4	2620682	ull_agg_cu_2013	-
1240	4	2780398	ull_agg_cu_2013	AT4G05500
1241	5	13861258	ull_agg_cu_2013	-
1242	5	13874253	ull_agg_cu_2013	FIM5
1243	5	14976840	ull_agg_cu_2013	-
1244	5	15940795	ull_agg_cu_2013	-
1245	5	15992439	ull_agg_cu_2013	AT5G39955
1246	5	16407165	ull_agg_cu_2013	FLA20
491	5	17489977	ull_agg_cu_2013	AT5G43530
1247	5	19182825	ull_agg_cu_2013	AT5G06965
1248	5	19207392	ull_agg_cu_2013	AT5G47330
498	5	26085936	ull_agg_cu_2013	AT5G65274
1249	5	26168984	ull_agg_cu_2013	KAC2
151	1	5519281	ull_agg_cu_2013	WAKL6
1250	3	8880442	ull_agg_cu_2013	AT3G24450
1251	3	8881244	ull_agg_cu_2013	AT3G24450
1252	3	8884288	ull_agg_cu_2013	-
1253	3	14947285	ull_agg_cu_2013	AT3G42860
1254	4	1973404	ull_agg_cu_2013	AT4G04110
1255	4	1997894	ull_agg_cu_2013	AT4G04150
1256	5	14976912	ull_agg_cu_2013	-
1257	3	11587073	ull_agg_bu_2013	-
1258	3	15645119	ull_agg_bu_2013	AT3G43740
1259	3	15645428	ull_agg_bu_2013	AT3G43740
1260	1	2400473	ull_agg_gu_2013	AT1G07740
1261	1	26303570	ull_agg_gu_2013	-
1262	3	822575	ull_agg_gu_2013	-
1263	1	26303816	ull_agg_gu_2013	-
1264	3	822998	ull_agg_gu_2013	AT3G03460
1194	1	5439643	ull_agg_pu_2013	AT1G15790
1196	1	5503859	ull_agg_pu_2013	Hsp70b
1265	2	8736845	ull_agg_pu_2013	PSAE-2
1201	3	6103181	ull_agg_pu_2013	AT3G17830
1204	3	10890363	ull_agg_pu_2013	AT3G28870
1212	3	14946443	ull_agg_pu_2013	AT3G42860
1215	3	15066186	ull_agg_pu_2013	AT3G43060
1216	3	15075923	ull_agg_pu_2013	LCR33
1221	3	15165642	ull_agg_pu_2013	-
1226	3	16591372	ull_agg_pu_2013	AT3G45253
1229	3	17841514	ull_agg_pu_2013	-
1230	3	17842724	ull_agg_pu_2013	-
1246	5	16407165	ull_agg_pu_2013	FLA20
1253	3	14947285	ull_agg_pu_2013	AT3G42860
1266	1	9164829	ull_alt_con_2013	AT1G26520
1267	1	9246484	ull_alt_con_2013	AT1G26740
1268	3	8431563	ull_alt_con_2013	AT3G23510
1269	3	8431525	ull_alt_con_2013	AT3G23510
1270	3	8433380	ull_alt_con_2013	-
1271	3	8429396	ull_alt_con_2013	AT3G23510
1272	3	8432593	ull_alt_con_2013	AT3G23510
1273	3	8433127	ull_alt_con_2013	AT3G23510
1274	3	8433186	ull_alt_con_2013	AT3G23510
1275	3	8434580	ull_alt_con_2013	AT3G04495
1276	3	8433624	ull_alt_con_2013	-
1277	5	15314972	ull_alt_con_2013	LCR58
1278	5	24921885	ull_alt_con_2013	-
1279	1	9167758	ull_alt_con_2013	AT1G26540
1280	1	9247429	ull_alt_con_2013	AT1G26750
1281	3	8434130	ull_alt_con_2013	-
1282	3	8434851	ull_alt_con_2013	AT3G04495
1283	3	8434976	ull_alt_con_2013	AT3G04495
1194	1	5439643	ull_alt_cu_2013	AT1G15790
1196	1	5503859	ull_alt_cu_2013	Hsp70b
1284	3	1932511	ull_alt_cu_2013	NHX4
1202	3	8185187	ull_alt_cu_2013	-
1204	3	10890363	ull_alt_cu_2013	AT3G28870
1206	3	11919392	ull_alt_cu_2013	CYP702A8
1207	3	12721298	ull_alt_cu_2013	AT3G31359
1209	3	12734488	ull_alt_cu_2013	-
1212	3	14946443	ull_alt_cu_2013	AT3G42860
1285	3	14987001	ull_alt_cu_2013	AT3G42920
1286	3	14987204	ull_alt_cu_2013	AT3G42920
1213	3	14990899	ull_alt_cu_2013	-
1214	3	15060174	ull_alt_cu_2013	-
1215	3	15066186	ull_alt_cu_2013	AT3G43060
1216	3	15075923	ull_alt_cu_2013	LCR33
1287	3	15079774	ull_alt_cu_2013	AT3G06505
1217	3	15085692	ull_alt_cu_2013	-
1288	3	15088351	ull_alt_cu_2013	AT3G43095
1218	3	15094689	ull_alt_cu_2013	AT3G43120
1219	3	15098631	ull_alt_cu_2013	AT3G43123
1289	3	15105390	ull_alt_cu_2013	AT3G43128
1290	3	15125740	ull_alt_cu_2013	AT3G43144
1291	3	15147127	ull_alt_cu_2013	-
1220	3	15154520	ull_alt_cu_2013	AT3G43156
1221	3	15165642	ull_alt_cu_2013	-
1222	3	15178893	ull_alt_cu_2013	AT3G43180
1223	3	15616998	ull_alt_cu_2013	LTPG2
1224	3	16195425	ull_alt_cu_2013	AT3G44620
1226	3	16591372	ull_alt_cu_2013	AT3G45253
1229	3	17841514	ull_alt_cu_2013	-
1230	3	17842724	ull_alt_cu_2013	-
1231	3	18816641	ull_alt_cu_2013	DWF4
1232	3	18953318	ull_alt_cu_2013	RTH
1239	4	2620682	ull_alt_cu_2013	-
1292	4	6694187	ull_alt_cu_2013	AT4G10895
1293	4	8173833	ull_alt_cu_2013	-
1246	5	16407165	ull_alt_cu_2013	FLA20
1294	5	26539196	ull_alt_cu_2013	MAN7
1295	5	26544180	ull_alt_cu_2013	AT5G66470
1296	5	26544258	ull_alt_cu_2013	AT5G66470
1253	3	14947285	ull_alt_cu_2013	AT3G42860
1297	5	26545042	ull_alt_cu_2013	AT5G66480
1094	1	8170970	ull_alt_bu_2013	MDP40
1298	1	24022674	ull_alt_bu_2013	ENODL8
1299	3	6170031	ull_alt_bu_2013	HON4
1300	3	7290310	ull_alt_bu_2013	-
1301	4	16322002	ull_alt_bu_2013	AT4G03365
1302	1	24022815	ull_alt_bu_2013	ENODL8
1303	1	24024635	ull_alt_bu_2013	AT1G64650
1304	1	10905267	ull_alt_eu_2013	AT1G30750
1305	1	10932004	ull_alt_eu_2013	-
1306	1	19218710	ull_alt_eu_2013	AT1G51802
1307	1	20144969	ull_alt_eu_2013	GLIP2
1308	1	20144417	ull_alt_eu_2013	GLIP2
1309	1	20144923	ull_alt_eu_2013	GLIP2
1310	1	20149529	ull_alt_eu_2013	AT1G53970
1311	1	20145636	ull_alt_eu_2013	-
1312	1	20147842	ull_alt_eu_2013	AT1G53950
1313	3	9024968	ull_alt_eu_2013	AT3G24715
1314	1	19220438	ull_alt_eu_2013	AT1G51805
1315	1	19220645	ull_alt_eu_2013	AT1G51805
1316	1	20150554	ull_alt_eu_2013	-
1267	1	9246484	ull_alt_gu_2013	AT1G26740
1317	3	10939565	ull_alt_gu_2013	-
1280	1	9247429	ull_alt_gu_2013	AT1G26750
1318	3	10939635	ull_alt_gu_2013	-
1194	1	5439643	ull_alt_pu_2013	AT1G15790
1196	1	5503859	ull_alt_pu_2013	Hsp70b
1265	2	8736845	ull_alt_pu_2013	PSAE-2
1201	3	6103181	ull_alt_pu_2013	AT3G17830
1204	3	10890363	ull_alt_pu_2013	AT3G28870
1212	3	14946443	ull_alt_pu_2013	AT3G42860
1221	3	15165642	ull_alt_pu_2013	-
1226	3	16591372	ull_alt_pu_2013	AT3G45253
1229	3	17841514	ull_alt_pu_2013	-
1230	3	17842724	ull_alt_pu_2013	-
1246	5	16407165	ull_alt_pu_2013	FLA20
1253	3	14947285	ull_alt_pu_2013	AT3G42860
1319	1	413954	ull_anta_con_2013	AT1G02180
1320	1	414212	ull_anta_con_2013	AT1G02180
1321	1	420866	ull_anta_con_2013	CER1
1322	1	5430776	ull_anta_con_2013	NRB4
1323	1	5435140	ull_anta_con_2013	NRB4
1324	1	5435159	ull_anta_con_2013	NRB4
1325	1	5438099	ull_anta_con_2013	-
1326	1	5470447	ull_anta_con_2013	AT1G15920
1327	1	8050428	ull_anta_con_2013	RABG3B
1328	1	17263259	ull_anta_con_2013	AT1G46696
1329	3	1398179	ull_anta_con_2013	-
1330	3	7450553	ull_anta_con_2013	4CL5
1331	3	14700703	ull_anta_con_2013	AT3G42620
1332	4	17726334	ull_anta_con_2013	GRF2
1333	4	17732502	ull_anta_con_2013	-
1334	4	17752490	ull_anta_con_2013	ACS8
1335	4	17753661	ull_anta_con_2013	ACS8
1336	4	17984808	ull_anta_con_2013	sks9
1337	4	17987775	ull_anta_con_2013	ROPGEF1
1338	4	17989151	ull_anta_con_2013	IYO
1339	4	17991894	ull_anta_con_2013	IYO
1340	4	18077362	ull_anta_con_2013	AT4G38700
1341	5	5820094	ull_anta_con_2013	AT5G17660
1342	5	5820714	ull_anta_con_2013	AT5G17660
1343	5	16903140	ull_anta_con_2013	VAR1
1344	5	16904585	ull_anta_con_2013	VAR1
1345	5	16904665	ull_anta_con_2013	VAR1
1346	5	16905771	ull_anta_con_2013	AT5G42280
1347	5	16905847	ull_anta_con_2013	AT5G42280
1348	5	16907416	ull_anta_con_2013	AT5G42280
1349	5	16918639	ull_anta_con_2013	AT5G42320
1350	5	16918145	ull_anta_con_2013	AT5G42310
1351	5	24238408	ull_anta_con_2013	-
1352	1	5430846	ull_anta_con_2013	NRB4
1353	1	5432630	ull_anta_con_2013	NRB4
1354	1	5433928	ull_anta_con_2013	NRB4
1355	1	5438116	ull_anta_con_2013	-
1356	1	5472311	ull_anta_con_2013	AT1G15930
1357	4	17758922	ull_anta_con_2013	MYB87
1358	4	17993261	ull_anta_con_2013	IYO
1359	5	5821387	ull_anta_con_2013	AT5G17670
1360	5	16911951	ull_anta_con_2013	UBL5
1361	5	16919843	ull_anta_con_2013	AT5G42320
1362	1	14065144	ull_anta_bu_2013	-
1363	2	17769951	ull_anta_bu_2013	AT2G09385
1364	3	4795719	ull_anta_bu_2013	-
1365	3	5105057	ull_anta_bu_2013	AT3G15160
1366	3	10482511	ull_anta_bu_2013	AT3G00470
1367	3	11534624	ull_anta_bu_2013	-
1368	3	20580976	ull_anta_bu_2013	RBL
1369	3	20582561	ull_anta_bu_2013	-
1370	3	20683413	ull_anta_bu_2013	MYB109
1371	3	23354819	ull_anta_bu_2013	AT3G63210
1372	4	6076707	ull_anta_bu_2013	-
1373	4	6573997	ull_anta_bu_2013	IQD16
1374	4	6574012	ull_anta_bu_2013	IQD16
1375	4	6574859	ull_anta_bu_2013	AT4G10650
1376	4	6575142	ull_anta_bu_2013	AT4G10650
1377	4	6575634	ull_anta_bu_2013	AT4G10650
1378	4	6576261	ull_anta_bu_2013	AT4G10650
1379	4	12583733	ull_anta_bu_2013	EMB140
1380	5	790920	ull_anta_bu_2013	EIN2
1381	5	792448	ull_anta_bu_2013	EIN2
1382	5	10893383	ull_anta_bu_2013	-
1383	5	20018032	ull_anta_bu_2013	-
1384	3	4798110	ull_anta_bu_2013	WAG2
1385	3	5105498	ull_anta_bu_2013	AT3G15160
1386	4	6574367	ull_anta_bu_2013	IQD16
1387	4	6575445	ull_anta_bu_2013	AT4G10650
1319	1	413954	ull_anta_eu_2013	AT1G02180
1388	3	1324251	ull_anta_eu_2013	AT3G04820
1389	3	1327553	ull_anta_eu_2013	AT3G04830
1390	4	6573810	ull_anta_eu_2013	IQD16
1378	4	6576261	ull_anta_eu_2013	AT4G10650
1391	5	908395	ull_anta_eu_2013	AT5G03590
1392	5	3579220	ull_anta_eu_2013	-
1393	5	3578805	ull_anta_eu_2013	-
1394	5	3578849	ull_anta_eu_2013	-
1395	5	3580630	ull_anta_eu_2013	AT5G11230
1396	5	3580148	ull_anta_eu_2013	-
1397	5	4187404	ull_anta_eu_2013	-
1398	5	12590254	ull_anta_eu_2013	CUE1
1399	5	12589366	ull_anta_eu_2013	CUE1
1400	5	12590012	ull_anta_eu_2013	CUE1
1401	3	1333441	ull_anta_eu_2013	AT3G04850
1402	5	3580957	ull_anta_eu_2013	AT5G11230
1403	5	4187539	ull_anta_eu_2013	-
1404	5	12591243	ull_anta_eu_2013	CUE1
1405	1	21459081	ull_anta_gu_2013	AT1G58025
1406	1	21464712	ull_anta_gu_2013	CAT2
1407	1	21464844	ull_anta_gu_2013	CAT2
1408	1	21465143	ull_anta_gu_2013	CAT2
1409	1	21467307	ull_anta_gu_2013	CAT2
1410	2	15319741	ull_anta_gu_2013	AT2G36500
1411	4	8505407	ull_anta_gu_2013	AT4G14815
1412	4	13223464	ull_anta_gu_2013	-
1413	5	2086159	ull_anta_gu_2013	AT5G06740
1414	5	6796131	ull_anta_gu_2013	AT5G20120
1415	5	9976679	ull_anta_gu_2013	AT5G27945
1416	1	21465596	ull_anta_gu_2013	CAT2
1417	1	21466898	ull_anta_gu_2013	CAT2
1418	4	8505840	ull_anta_gu_2013	AT4G14815
1419	2	6935110	ull_anta_pu_2013	AT2G15910
1420	5	3578558	ull_anta_pu_2013	-
1421	5	3578764	ull_anta_pu_2013	-
1422	1	7955944	ull_mutu_con_2013	PATL2
1423	1	8723883	ull_mutu_con_2013	AT1G24620
1424	1	13723157	ull_mutu_con_2013	AT1G36430
1425	1	27861354	ull_mutu_con_2013	AT1G74088
1426	1	29581986	ull_mutu_con_2013	AT1G78640
1427	1	29636639	ull_mutu_con_2013	-
1428	2	536820	ull_mutu_con_2013	-
1429	2	9549967	ull_mutu_con_2013	AT2G07585
1430	2	17825035	ull_mutu_con_2013	-
1431	3	1777895	ull_mutu_con_2013	AT3G05940
1330	3	7450553	ull_mutu_con_2013	4CL5
1432	3	10166368	ull_mutu_con_2013	AT3G27470
1433	3	18695987	ull_mutu_con_2013	AT3G50380
1434	4	2412196	ull_mutu_con_2013	-
1435	4	2523739	ull_mutu_con_2013	ALN
1436	4	7499646	ull_mutu_con_2013	AT4G12750
1437	4	17760103	ull_mutu_con_2013	-
1438	4	17908125	ull_mutu_con_2013	FRS5
1336	4	17984808	ull_mutu_con_2013	sks9
1439	4	17986216	ull_mutu_con_2013	-
1337	4	17987775	ull_mutu_con_2013	ROPGEF1
1338	4	17989151	ull_mutu_con_2013	IYO
1339	4	17991894	ull_mutu_con_2013	IYO
1340	4	18077362	ull_mutu_con_2013	AT4G38700
1440	4	18079511	ull_mutu_con_2013	AT4G38710
1441	4	18079865	ull_mutu_con_2013	AT4G38710
1442	5	5818131	ull_mutu_con_2013	AT5G17650
1443	5	5818862	ull_mutu_con_2013	AT5G17660
1444	5	5819189	ull_mutu_con_2013	AT5G17660
1445	5	16386030	ull_mutu_con_2013	-
1347	5	16905847	ull_mutu_con_2013	AT5G42280
1343	5	16903140	ull_mutu_con_2013	VAR1
1345	5	16904665	ull_mutu_con_2013	VAR1
1346	5	16905771	ull_mutu_con_2013	AT5G42280
1348	5	16907416	ull_mutu_con_2013	AT5G42280
1446	5	24524322	ull_mutu_con_2013	AT5G60940
1447	1	7958530	ull_mutu_con_2013	PATL2
1448	1	29638687	ull_mutu_con_2013	AT1G78830
1358	4	17993261	ull_mutu_con_2013	IYO
1449	4	17986876	ull_mutu_con_2013	ROPGEF1
1450	4	18079937	ull_mutu_con_2013	AT4G38710
1451	5	5821723	ull_mutu_con_2013	AT5G17670
1360	5	16911951	ull_mutu_con_2013	UBL5
1452	1	21499553	ull_mutu_cu_2013	AT1G58060
1453	1	26938936	ull_mutu_cu_2013	AT1G71520
1454	4	1782656	ull_mutu_cu_2013	AT4G03824
1455	2	14426503	ull_mutu_bu_2013	AT2G34160
1456	2	16070230	ull_mutu_bu_2013	PRA1.B4
1431	3	1777895	ull_mutu_bu_2013	AT3G05940
1457	3	2698552	ull_mutu_bu_2013	PYD4
1458	3	2704069	ull_mutu_bu_2013	AT3G08880
1459	3	2704717	ull_mutu_bu_2013	AT3G08880
1460	3	15019146	ull_mutu_bu_2013	ATA1
1461	3	17041066	ull_mutu_bu_2013	AT3G46355
1462	3	17032146	ull_mutu_bu_2013	-
1463	3	17041455	ull_mutu_bu_2013	AT3G46355
1464	3	20801652	ull_mutu_bu_2013	-
1465	4	10121225	ull_mutu_bu_2013	AT4G18300
1466	5	5800	ull_mutu_bu_2013	AT5G01015
1467	5	8683	ull_mutu_bu_2013	-
1445	5	16386030	ull_mutu_bu_2013	-
1468	5	17126113	ull_mutu_bu_2013	TRM30
1469	3	2699055	ull_mutu_bu_2013	PYD4
1470	3	2705299	ull_mutu_bu_2013	AT3G08885
1471	3	17049464	ull_mutu_bu_2013	-
1472	5	9131	ull_mutu_bu_2013	-
1425	1	27861354	ull_mutu_eu_2013	AT1G74088
1330	3	7450553	ull_mutu_eu_2013	4CL5
1463	3	17041455	ull_mutu_eu_2013	AT3G46355
1466	5	5800	ull_mutu_eu_2013	AT5G01015
1467	5	8683	ull_mutu_eu_2013	-
1395	5	3580630	ull_mutu_eu_2013	AT5G11230
1393	5	3578805	ull_mutu_eu_2013	-
1394	5	3578849	ull_mutu_eu_2013	-
1392	5	3579220	ull_mutu_eu_2013	-
1396	5	3580148	ull_mutu_eu_2013	-
1473	5	19042936	ull_mutu_eu_2013	-
1472	5	9131	ull_mutu_eu_2013	-
1402	5	3580957	ull_mutu_eu_2013	AT5G11230
1474	5	19045264	ull_mutu_eu_2013	-
1475	2	8929077	ull_mutu_gu_2013	AT2G20720
1476	3	16954412	ull_mutu_gu_2013	UTR5
1477	3	16954538	ull_mutu_gu_2013	UTR5
1478	3	16954881	ull_mutu_gu_2013	UTR5
1466	5	5800	ull_mutu_gu_2013	AT5G01015
1467	5	8683	ull_mutu_gu_2013	-
1479	3	16955150	ull_mutu_gu_2013	UTR5
1472	5	9131	ull_mutu_gu_2013	-
1453	1	26938936	ull_mutu_pu_2013	AT1G71520
1425	1	27861354	ull_mutu_pu_2013	AT1G74088
1330	3	7450553	ull_mutu_pu_2013	4CL5
1454	4	1782656	ull_mutu_pu_2013	AT4G03824

## Sheet: SR_2012
Supplemental Table 6 The list of significant SNPs in SR in 2012
NUM	CHR	Position	ENV	gene_name
91	3	8086711	rat_agg_con_2012	-
92	4	733140	rat_agg_con_2012	AT4G01700
93	5	2971903	rat_agg_con_2012	AT5G09570
94	5	5557413	rat_agg_con_2012	AT5G16900
95	5	5991593	rat_agg_con_2012	APRL7
96	5	6002985	rat_agg_con_2012	AT5G18160
97	5	6003149	rat_agg_con_2012	AT5G18160
98	1	7743587	rat_agg_cu_2012	-
99	2	1359748	rat_agg_cu_2012	-
100	2	2474920	rat_agg_cu_2012	-
101	2	2504811	rat_agg_cu_2012	-
102	2	2534034	rat_agg_cu_2012	AT2G06410
103	2	8179221	rat_agg_cu_2012	-
104	2	10578032	rat_agg_cu_2012	AT2G24830
105	3	7994510	rat_agg_cu_2012	-
106	3	8003003	rat_agg_cu_2012	AT3G22580
107	3	13025137	rat_agg_cu_2012	AT3G32031
108	4	1269248	rat_agg_cu_2012	AT4G02860
109	4	1387741	rat_agg_cu_2012	AT4G03120
110	4	1389084	rat_agg_cu_2012	AT4G03130
111	4	1487241	rat_agg_cu_2012	AT4G03380
112	4	17387096	rat_agg_cu_2012	-
113	5	12728975	rat_agg_cu_2012	AT5G33432
114	2	2476094	rat_agg_cu_2012	AT2G06290
115	2	8182715	rat_agg_cu_2012	-
116	3	8007038	rat_agg_cu_2012	AT3G22600
117	4	1269548	rat_agg_cu_2012	AT4G02860
118	4	1271641	rat_agg_cu_2012	AT4G02870
119	4	1390494	rat_agg_cu_2012	AT4G03130
120	1	17899150	rat_agg_bu_2012	-
121	1	17897726	rat_agg_bu_2012	D-CDES
122	1	26850394	rat_agg_bu_2012	EBS1
123	5	23749406	rat_agg_bu_2012	AT5G58810
124	5	23866220	rat_agg_bu_2012	SBT4.13
125	1	17906019	rat_agg_bu_2012	AT1G48430
126	1	17907976	rat_agg_bu_2012	AT1G48440
127	1	5504111	rat_agg_gu_2012	Hsp70b
128	1	5510455	rat_agg_gu_2012	ADAP
129	1	5513718	rat_agg_gu_2012	TLP8
130	1	5515696	rat_agg_gu_2012	AT1G16080
131	1	17283448	rat_agg_gu_2012	RD21A
132	2	2332264	rat_agg_gu_2012	-
100	2	2474920	rat_agg_gu_2012	-
101	2	2504811	rat_agg_gu_2012	-
102	2	2534034	rat_agg_gu_2012	AT2G06410
133	2	2693276	rat_agg_gu_2012	AT2G06760
134	2	2721771	rat_agg_gu_2012	AT2G06810
135	2	2736499	rat_agg_gu_2012	-
136	2	2807589	rat_agg_gu_2012	AT2G06906
137	2	2884593	rat_agg_gu_2012	AT2G06980
138	3	7376750	rat_agg_gu_2012	PSBTN
91	3	8086711	rat_agg_gu_2012	-
92	4	733140	rat_agg_gu_2012	AT4G01700
139	4	2166787	rat_agg_gu_2012	-
140	4	2196034	rat_agg_gu_2012	-
112	4	17387096	rat_agg_gu_2012	-
141	5	2181461	rat_agg_gu_2012	AT5G07020
93	5	2971903	rat_agg_gu_2012	AT5G09570
94	5	5557413	rat_agg_gu_2012	AT5G16900
142	5	5870044	rat_agg_gu_2012	VAR3
143	5	5870176	rat_agg_gu_2012	VAR3
144	5	5870351	rat_agg_gu_2012	VAR3
145	5	5870749	rat_agg_gu_2012	VAR3
146	5	5871199	rat_agg_gu_2012	VAR3
147	5	5872688	rat_agg_gu_2012	VAR3
148	5	5871677	rat_agg_gu_2012	VAR3
149	5	5991696	rat_agg_gu_2012	APRL7
150	5	16637929	rat_agg_gu_2012	BTI3
151	1	5519281	rat_agg_gu_2012	WAKL6
114	2	2476094	rat_agg_gu_2012	AT2G06290
152	4	2167533	rat_agg_gu_2012	AT4G04404
153	5	5873818	rat_agg_gu_2012	-
111	4	1487241	rat_agg_pu_2012	AT4G03380
154	5	4869269	rat_agg_pu_2012	-
155	1	1900544	rat_alt_cu_2012	MEE5
99	2	1359748	rat_alt_cu_2012	-
105	3	7994510	rat_alt_cu_2012	-
106	3	8003003	rat_alt_cu_2012	AT3G22580
156	3	22150387	rat_alt_cu_2012	ASHH4
157	4	1260361	rat_alt_cu_2012	AT4G02820
158	4	1262435	rat_alt_cu_2012	AT4G02830
108	4	1269248	rat_alt_cu_2012	AT4G02860
118	4	1271641	rat_alt_cu_2012	AT4G02870
117	4	1269548	rat_alt_cu_2012	AT4G02860
159	4	1272732	rat_alt_cu_2012	AT4G02870
160	4	1275060	rat_alt_cu_2012	AT4G02880
161	4	1284012	rat_alt_cu_2012	AT4G02900
162	4	1288612	rat_alt_cu_2012	AT4G02910
163	4	1292848	rat_alt_cu_2012	AT4G02920
164	4	1299426	rat_alt_cu_2012	-
165	4	1309390	rat_alt_cu_2012	AT4G02940
166	4	1308587	rat_alt_cu_2012	AT4G02940
167	4	1309300	rat_alt_cu_2012	AT4G02940
168	4	1320750	rat_alt_cu_2012	ABP1
169	4	1321123	rat_alt_cu_2012	ABP1
170	4	1324277	rat_alt_cu_2012	AT4G03000
171	4	1327075	rat_alt_cu_2012	AT4G03000
172	4	1328991	rat_alt_cu_2012	-
173	4	1328774	rat_alt_cu_2012	-
174	4	1335812	rat_alt_cu_2012	AT4G03030
175	4	1335627	rat_alt_cu_2012	-
176	4	1368961	rat_alt_cu_2012	AT4G03090
177	4	1365141	rat_alt_cu_2012	BSL1
178	4	1366762	rat_alt_cu_2012	AT4G03090
179	4	1367831	rat_alt_cu_2012	AT4G03090
180	4	1368426	rat_alt_cu_2012	AT4G03090
181	4	1374693	rat_alt_cu_2012	AT4G03100
182	4	1370257	rat_alt_cu_2012	AT4G03090
183	4	1376130	rat_alt_cu_2012	AT4G03100
109	4	1387741	rat_alt_cu_2012	AT4G03120
110	4	1389084	rat_alt_cu_2012	AT4G03130
184	4	1410223	rat_alt_cu_2012	AT4G03200
185	4	1471205	rat_alt_cu_2012	AT4G04535
111	4	1487241	rat_alt_cu_2012	AT4G03380
186	4	1492554	rat_alt_cu_2012	SRF3
187	4	1502152	rat_alt_cu_2012	AT4G03410
188	4	1501488	rat_alt_cu_2012	DFL2
189	4	1503363	rat_alt_cu_2012	AT4G03410
190	4	1504940	rat_alt_cu_2012	PP2C52
191	4	1506748	rat_alt_cu_2012	-
192	4	1507633	rat_alt_cu_2012	-
193	4	9564816	rat_alt_cu_2012	RLM3
112	4	17387096	rat_alt_cu_2012	-
194	5	2191545	rat_alt_cu_2012	UMAMIT9
195	5	21576265	rat_alt_cu_2012	-
196	1	1903980	rat_alt_cu_2012	MEE5
116	3	8007038	rat_alt_cu_2012	AT3G22600
197	4	1275971	rat_alt_cu_2012	AT4G02880
198	4	1309615	rat_alt_cu_2012	AT4G02940
199	4	1329578	rat_alt_cu_2012	AT4G03010
200	4	1342433	rat_alt_cu_2012	AT4G03040
201	4	1369334	rat_alt_cu_2012	AT4G03090
202	4	1369599	rat_alt_cu_2012	AT4G03090
203	4	1377499	rat_alt_cu_2012	RBP-DR1
204	4	1378592	rat_alt_cu_2012	RBP-DR1
119	4	1390494	rat_alt_cu_2012	AT4G03130
205	4	1509997	rat_alt_cu_2012	-
206	5	2193816	rat_alt_cu_2012	-
207	4	8885599	rat_alt_bu_2012	CLA1
208	1	7470632	rat_alt_eu_2012	-
209	1	10545053	rat_alt_eu_2012	-
210	1	10655338	rat_alt_eu_2012	CIPK23
211	1	10661328	rat_alt_eu_2012	-
212	1	26638905	rat_alt_eu_2012	AT1G70650
213	2	12865750	rat_alt_eu_2012	-
214	3	4779149	rat_alt_eu_2012	AT3G14330
215	1	10662532	rat_alt_eu_2012	-
216	1	39751	rat_alt_pu_2012	UMAMIT28
99	2	1359748	rat_alt_pu_2012	-
111	4	1487241	rat_alt_pu_2012	AT4G03380
193	4	9564816	rat_alt_pu_2012	RLM3
112	4	17387096	rat_alt_pu_2012	-
154	5	4869269	rat_alt_pu_2012	-
217	1	46912	rat_alt_pu_2012	AT1G01080
218	2	19621077	rat_anta_con_2012	DEG2
219	2	19621862	rat_anta_con_2012	DEG2
220	4	7999218	rat_anta_con_2012	-
221	4	13997083	rat_anta_con_2012	AT4G28230
222	4	14087002	rat_anta_con_2012	-
223	4	14115512	rat_anta_con_2012	RIC7
224	4	14117089	rat_anta_con_2012	RIC7
225	5	691807	rat_anta_con_2012	AT5G02950
226	5	692593	rat_anta_con_2012	AT5G02950
227	5	2576489	rat_anta_con_2012	GDPD6
228	5	2577074	rat_anta_con_2012	TOM5
229	5	2660395	rat_anta_con_2012	scpl35
230	1	28920639	rat_anta_cu_2012	AT1G76960
231	1	28920399	rat_anta_cu_2012	AT1G76960
232	3	18991183	rat_anta_cu_2012	AT3G51120
220	4	7999218	rat_anta_cu_2012	-
222	4	14087002	rat_anta_cu_2012	-
227	5	2576489	rat_anta_cu_2012	GDPD6
233	5	17830784	rat_anta_cu_2012	AT5G44260
234	5	26126638	rat_anta_cu_2012	-
235	1	28921029	rat_anta_cu_2012	-
228	5	2577074	rat_anta_cu_2012	TOM5
236	1	21374484	rat_anta_bu_2012	-
237	1	21497356	rat_anta_bu_2012	AT1G58060
238	1	23285243	rat_anta_bu_2012	AT1G62870
239	1	27861251	rat_anta_bu_2012	AT1G74088
240	1	28099524	rat_anta_bu_2012	AT1G74790
241	1	28100115	rat_anta_bu_2012	AT1G74790
242	1	28117940	rat_anta_bu_2012	-
243	1	28124881	rat_anta_bu_2012	AT1G74860
244	1	28133681	rat_anta_bu_2012	-
245	1	28136604	rat_anta_bu_2012	AT1G74910
246	1	28136776	rat_anta_bu_2012	AT1G74910
247	1	28138650	rat_anta_bu_2012	AT1G74910
248	2	8471776	rat_anta_bu_2012	AT2G19572
249	2	8503456	rat_anta_bu_2012	PLA2-BETA
250	3	2382230	rat_anta_bu_2012	AT3G07440
251	3	22371377	rat_anta_bu_2012	-
252	3	22490265	rat_anta_bu_2012	AT3G60860
253	4	10410039	rat_anta_bu_2012	AT4G19006
254	4	15170120	rat_anta_bu_2012	AT4G31210
255	5	534674	rat_anta_bu_2012	AT5G02450
256	5	17924101	rat_anta_bu_2012	AT5G44490
220	4	7999218	rat_anta_eu_2012	-
222	4	14087002	rat_anta_eu_2012	-
225	5	691807	rat_anta_eu_2012	AT5G02950
227	5	2576489	rat_anta_eu_2012	GDPD6
257	5	26701760	rat_anta_eu_2012	AT5G66860
228	5	2577074	rat_anta_eu_2012	TOM5
232	3	18991183	rat_anta_gu_2012	AT3G51120
258	4	10814707	rat_anta_gu_2012	KUP9
259	4	10817366	rat_anta_gu_2012	-
227	5	2576489	rat_anta_gu_2012	GDPD6
260	4	10814856	rat_anta_gu_2012	KUP9
228	5	2577074	rat_anta_gu_2012	TOM5
261	1	3352575	rat_anta_pu_2012	AT1G10220
262	1	3350737	rat_anta_pu_2012	MPK1
263	1	5177599	rat_anta_pu_2012	AT1G15030
230	1	28920639	rat_anta_pu_2012	AT1G76960
231	1	28920399	rat_anta_pu_2012	AT1G76960
250	3	2382230	rat_anta_pu_2012	AT3G07440
251	3	22371377	rat_anta_pu_2012	-
264	3	22435549	rat_anta_pu_2012	AT3G60690
220	4	7999218	rat_anta_pu_2012	-
233	5	17830784	rat_anta_pu_2012	AT5G44260
234	5	26126638	rat_anta_pu_2012	-
257	5	26701760	rat_anta_pu_2012	AT5G66860
265	5	26726432	rat_anta_pu_2012	AT5G66930
266	5	26726627	rat_anta_pu_2012	AT5G66930
267	1	3352630	rat_anta_pu_2012	AT1G10220
268	1	3353722	rat_anta_pu_2012	-
235	1	28921029	rat_anta_pu_2012	-
269	3	2382675	rat_anta_pu_2012	AT3G07440
270	3	22373703	rat_anta_pu_2012	GATA4
271	5	26727756	rat_anta_pu_2012	AT5G66930
272	1	6458308	rat_mutu_con_2012	AT1G18720
273	1	8657799	rat_mutu_con_2012	AT1G24420
274	1	8659392	rat_mutu_con_2012	AT1G24430
275	1	17231451	rat_mutu_con_2012	-
276	1	26466595	rat_mutu_con_2012	AT1G70280
277	2	2819353	rat_mutu_con_2012	AT2G06910
278	2	8358111	rat_mutu_con_2012	AT2G19260
279	2	15873925	rat_mutu_con_2012	AT2G37930
280	2	15873964	rat_mutu_con_2012	AT2G37930
281	2	19101487	rat_mutu_con_2012	-
282	4	336078	rat_mutu_con_2012	AT4G00780
283	4	463444	rat_mutu_con_2012	GT72B1
284	4	6803265	rat_mutu_con_2012	AT4G11160
285	4	13350958	rat_mutu_con_2012	GAMT1
286	4	13964817	rat_mutu_con_2012	-
287	4	14096632	rat_mutu_con_2012	-
288	4	14115267	rat_mutu_con_2012	RIC7
289	5	6397521	rat_mutu_con_2012	-
290	5	7271121	rat_mutu_con_2012	AT5G00440
291	5	24253871	rat_mutu_con_2012	AT5G60250
292	5	24253229	rat_mutu_con_2012	AT5G60250
293	1	8660367	rat_mutu_con_2012	AT1G05903
294	1	26467874	rat_mutu_con_2012	AT1G70280
223	4	14115512	rat_mutu_con_2012	RIC7
224	4	14117089	rat_mutu_con_2012	RIC7
295	5	6398542	rat_mutu_con_2012	-
296	5	24256055	rat_mutu_con_2012	AT5G60260
297	1	1077730	rat_mutu_cu_2012	AT1G04140
273	1	8657799	rat_mutu_cu_2012	AT1G24420
274	1	8659392	rat_mutu_cu_2012	AT1G24430
298	1	8687099	rat_mutu_cu_2012	AT1G24510
299	1	10516060	rat_mutu_cu_2012	nMAT1
300	1	22197087	rat_mutu_cu_2012	-
301	1	22199698	rat_mutu_cu_2012	PUB19
302	1	22199764	rat_mutu_cu_2012	PUB19
303	2	104435	rat_mutu_cu_2012	BAT1
304	2	5046902	rat_mutu_cu_2012	AT2G12460
278	2	8358111	rat_mutu_cu_2012	AT2G19260
305	2	8461057	rat_mutu_cu_2012	AT2G19530
279	2	15873925	rat_mutu_cu_2012	AT2G37930
281	2	19101487	rat_mutu_cu_2012	-
306	3	23349602	rat_mutu_cu_2012	-
282	4	336078	rat_mutu_cu_2012	AT4G00780
307	4	336134	rat_mutu_cu_2012	AT4G00780
284	4	6803265	rat_mutu_cu_2012	AT4G11160
308	5	6393146	rat_mutu_cu_2012	-
289	5	6397521	rat_mutu_cu_2012	-
290	5	7271121	rat_mutu_cu_2012	AT5G00440
292	5	24253229	rat_mutu_cu_2012	AT5G60250
291	5	24253871	rat_mutu_cu_2012	AT5G60250
309	5	24255978	rat_mutu_cu_2012	AT5G60260
293	1	8660367	rat_mutu_cu_2012	AT1G05903
310	5	6394337	rat_mutu_cu_2012	-
295	5	6398542	rat_mutu_cu_2012	-
296	5	24256055	rat_mutu_cu_2012	AT5G60260
272	1	6458308	rat_mutu_eu_2012	AT1G18720
273	1	8657799	rat_mutu_eu_2012	AT1G24420
274	1	8659392	rat_mutu_eu_2012	AT1G24430
275	1	17231451	rat_mutu_eu_2012	-
276	1	26466595	rat_mutu_eu_2012	AT1G70280
277	2	2819353	rat_mutu_eu_2012	AT2G06910
278	2	8358111	rat_mutu_eu_2012	AT2G19260
279	2	15873925	rat_mutu_eu_2012	AT2G37930
280	2	15873964	rat_mutu_eu_2012	AT2G37930
281	2	19101487	rat_mutu_eu_2012	-
282	4	336078	rat_mutu_eu_2012	AT4G00780
283	4	463444	rat_mutu_eu_2012	GT72B1
284	4	6803265	rat_mutu_eu_2012	AT4G11160
285	4	13350958	rat_mutu_eu_2012	GAMT1
286	4	13964817	rat_mutu_eu_2012	-
287	4	14096632	rat_mutu_eu_2012	-
288	4	14115267	rat_mutu_eu_2012	RIC7
289	5	6397521	rat_mutu_eu_2012	-
290	5	7271121	rat_mutu_eu_2012	AT5G00440
291	5	24253871	rat_mutu_eu_2012	AT5G60250
292	5	24253229	rat_mutu_eu_2012	AT5G60250
293	1	8660367	rat_mutu_eu_2012	AT1G05903
294	1	26467874	rat_mutu_eu_2012	AT1G70280
223	4	14115512	rat_mutu_eu_2012	RIC7
224	4	14117089	rat_mutu_eu_2012	RIC7
295	5	6398542	rat_mutu_eu_2012	-
296	5	24256055	rat_mutu_eu_2012	AT5G60260
311	1	45075	rat_mutu_gu_2012	AT1G01080
312	1	1127110	rat_mutu_gu_2012	AT1G04230
313	1	3834348	rat_mutu_gu_2012	AT1G11380
314	1	9405110	rat_mutu_gu_2012	AT1G27090
315	1	13611243	rat_mutu_gu_2012	AT1G36230
316	1	18932655	rat_mutu_gu_2012	-
300	1	22197087	rat_mutu_gu_2012	-
317	1	22199440	rat_mutu_gu_2012	PUB19
301	1	22199698	rat_mutu_gu_2012	PUB19
302	1	22199764	rat_mutu_gu_2012	PUB19
318	1	24232394	rat_mutu_gu_2012	AT1G65240
303	2	104435	rat_mutu_gu_2012	BAT1
319	2	2129177	rat_mutu_gu_2012	-
304	2	5046902	rat_mutu_gu_2012	AT2G12460
320	2	5538460	rat_mutu_gu_2012	-
305	2	8461057	rat_mutu_gu_2012	AT2G19530
321	2	9136662	rat_mutu_gu_2012	AT2G21340
322	2	9221450	rat_mutu_gu_2012	SFH3
323	3	8984110	rat_mutu_gu_2012	-
306	3	23349602	rat_mutu_gu_2012	-
324	4	190671	rat_mutu_gu_2012	-
282	4	336078	rat_mutu_gu_2012	AT4G00780
307	4	336134	rat_mutu_gu_2012	AT4G00780
325	4	373151	rat_mutu_gu_2012	-
326	4	2524801	rat_mutu_gu_2012	ALN
327	4	7318836	rat_mutu_gu_2012	CYP706A7
328	4	7515391	rat_mutu_gu_2012	AT4G12780
329	4	10104794	rat_mutu_gu_2012	AT4G18280
330	4	10148581	rat_mutu_gu_2012	GOX3
331	4	11244586	rat_mutu_gu_2012	AT4G21060
332	4	11252619	rat_mutu_gu_2012	BRCA1
333	4	16762144	rat_mutu_gu_2012	AT4G35240
334	4	16765294	rat_mutu_gu_2012	AT4G35240
335	5	759512	rat_mutu_gu_2012	CPUORF47
336	5	6377428	rat_mutu_gu_2012	AT5G19070
289	5	6397521	rat_mutu_gu_2012	-
337	5	6586744	rat_mutu_gu_2012	MSL9
338	5	6587611	rat_mutu_gu_2012	MSL9
339	5	6587816	rat_mutu_gu_2012	MSL9
340	5	12988956	rat_mutu_gu_2012	AT5G34833
341	5	17959349	rat_mutu_gu_2012	AT5G00585
292	5	24253229	rat_mutu_gu_2012	AT5G60250
291	5	24253871	rat_mutu_gu_2012	AT5G60250
309	5	24255978	rat_mutu_gu_2012	AT5G60260
342	2	9138316	rat_mutu_gu_2012	XK-1
295	5	6398542	rat_mutu_gu_2012	-
343	5	6587888	rat_mutu_gu_2012	MSL9
296	5	24256055	rat_mutu_gu_2012	AT5G60260
311	1	45075	rat_mutu_pu_2012	AT1G01080
297	1	1077730	rat_mutu_pu_2012	AT1G04140
273	1	8657799	rat_mutu_pu_2012	AT1G24420
274	1	8659392	rat_mutu_pu_2012	AT1G24430
298	1	8687099	rat_mutu_pu_2012	AT1G24510
299	1	10516060	rat_mutu_pu_2012	nMAT1
300	1	22197087	rat_mutu_pu_2012	-
317	1	22199440	rat_mutu_pu_2012	PUB19
301	1	22199698	rat_mutu_pu_2012	PUB19
302	1	22199764	rat_mutu_pu_2012	PUB19
318	1	24232394	rat_mutu_pu_2012	AT1G65240
303	2	104435	rat_mutu_pu_2012	BAT1
344	2	4010581	rat_mutu_pu_2012	AT2G10430
304	2	5046902	rat_mutu_pu_2012	AT2G12460
320	2	5538460	rat_mutu_pu_2012	-
278	2	8358111	rat_mutu_pu_2012	AT2G19260
305	2	8461057	rat_mutu_pu_2012	AT2G19530
279	2	15873925	rat_mutu_pu_2012	AT2G37930
306	3	23349602	rat_mutu_pu_2012	-
282	4	336078	rat_mutu_pu_2012	AT4G00780
307	4	336134	rat_mutu_pu_2012	AT4G00780
335	5	759512	rat_mutu_pu_2012	CPUORF47
289	5	6397521	rat_mutu_pu_2012	-
337	5	6586744	rat_mutu_pu_2012	MSL9
292	5	24253229	rat_mutu_pu_2012	AT5G60250
291	5	24253871	rat_mutu_pu_2012	AT5G60250
309	5	24255978	rat_mutu_pu_2012	AT5G60260
293	1	8660367	rat_mutu_pu_2012	AT1G05903
295	5	6398542	rat_mutu_pu_2012	-
296	5	24256055	rat_mutu_pu_2012	AT5G60260

## Sheet: SR_2013
Supplemental Table 6 The list of significant SNPs in SR in 2013
NUM	CHR	Position	ENV	gene_name
1480	1	157491	rat_agg_con_2013	TBL25
1481	1	175723	rat_agg_con_2013	ACS2
1482	1	178094	rat_agg_con_2013	ACS2
1483	4	479773	rat_agg_con_2013	ADNT1
1484	4	7894464	rat_agg_con_2013	-
1485	5	7619049	rat_agg_con_2013	EMB1030
1486	5	7622182	rat_agg_con_2013	AT5G22810
1487	5	7622564	rat_agg_con_2013	AT5G22810
1488	5	7622849	rat_agg_con_2013	AT5G22810
1489	5	7624144	rat_agg_con_2013	AT5G22820
1490	5	7625340	rat_agg_con_2013	AT5G22820
1491	5	7625656	rat_agg_con_2013	AT5G22820
1492	5	7627193	rat_agg_con_2013	-
1493	5	7631300	rat_agg_con_2013	AT5G22840
1494	5	7634212	rat_agg_con_2013	AT5G22850
1495	1	8002202	rat_agg_cu_2013	ATSAC1
1496	1	15549630	rat_agg_cu_2013	AT1G41790
552	1	29354875	rat_agg_cu_2013	-
549	1	29354139	rat_agg_cu_2013	-
550	1	29354300	rat_agg_cu_2013	-
1497	3	5568969	rat_agg_cu_2013	-
1498	3	18428989	rat_agg_cu_2013	MYB84
1499	4	2169965	rat_agg_cu_2013	-
1500	4	2828054	rat_agg_cu_2013	-
1501	4	12042829	rat_agg_cu_2013	ESP
1502	5	8844457	rat_agg_cu_2013	-
1503	5	10456298	rat_agg_cu_2013	-
1504	5	15541198	rat_agg_cu_2013	AT5G38810
1505	5	16478546	rat_agg_cu_2013	AT5G41170
1506	5	17091086	rat_agg_cu_2013	AT5G42645
1507	1	8002746	rat_agg_cu_2013	ATSAC1
553	1	29355290	rat_agg_cu_2013	AT1G78070
551	1	29355538	rat_agg_cu_2013	AT1G78070
554	1	29355945	rat_agg_cu_2013	AT1G78070
556	1	29356439	rat_agg_cu_2013	AT1G78070
557	1	29357329	rat_agg_cu_2013	AT1G78070
558	1	29357921	rat_agg_cu_2013	AT1G78070
1480	1	157491	rat_agg_gu_2013	TBL25
1481	1	175723	rat_agg_gu_2013	ACS2
1508	4	6585543	rat_agg_gu_2013	GTC2
1485	5	7619049	rat_agg_gu_2013	EMB1030
1486	5	7622182	rat_agg_gu_2013	AT5G22810
1487	5	7622564	rat_agg_gu_2013	AT5G22810
1489	5	7624144	rat_agg_gu_2013	AT5G22820
1490	5	7625340	rat_agg_gu_2013	AT5G22820
1488	5	7622849	rat_agg_gu_2013	AT5G22810
1491	5	7625656	rat_agg_gu_2013	AT5G22820
1492	5	7627193	rat_agg_gu_2013	-
1493	5	7631300	rat_agg_gu_2013	AT5G22840
1509	1	178636	rat_agg_gu_2013	-
1510	5	7631698	rat_agg_gu_2013	AT5G22840
1494	5	7634212	rat_agg_gu_2013	AT5G22850
1495	1	8002202	rat_agg_pu_2013	ATSAC1
1496	1	15549630	rat_agg_pu_2013	AT1G41790
1498	3	18428989	rat_agg_pu_2013	MYB84
1500	4	2828054	rat_agg_pu_2013	-
1501	4	12042829	rat_agg_pu_2013	ESP
1504	5	15541198	rat_agg_pu_2013	AT5G38810
1505	5	16478546	rat_agg_pu_2013	AT5G41170
1507	1	8002746	rat_agg_pu_2013	ATSAC1
1496	1	15549630	rat_alt_cu_2013	AT1G41790
1498	3	18428989	rat_alt_cu_2013	MYB84
1500	4	2828054	rat_alt_cu_2013	-
1502	5	8844457	rat_alt_cu_2013	-
1503	5	10456298	rat_alt_cu_2013	-
1504	5	15541198	rat_alt_cu_2013	AT5G38810
1505	5	16478546	rat_alt_cu_2013	AT5G41170
1511	5	26749134	rat_alt_cu_2013	AT5G67010
1506	5	17091086	rat_alt_bu_2013	AT5G42645
1512	2	10168444	rat_alt_eu_2013	AT2G23880
1513	2	10792636	rat_alt_eu_2013	-
1514	2	10846314	rat_alt_eu_2013	AT2G25482
1515	3	5210528	rat_alt_eu_2013	AT3G15430
1516	3	15650907	rat_alt_eu_2013	AT3G43770
1517	3	17469075	rat_alt_eu_2013	AT3G47410
1518	4	364103	rat_alt_eu_2013	AT4G00872
1519	4	8427810	rat_alt_eu_2013	PPD1
1520	5	171768	rat_alt_eu_2013	-
1505	5	16478546	rat_alt_eu_2013	AT5G41170
1521	5	17081141	rat_alt_eu_2013	-
1522	5	19291992	rat_alt_eu_2013	-
1523	5	173754	rat_alt_eu_2013	-
1496	1	15549630	rat_alt_pu_2013	AT1G41790
1498	3	18428989	rat_alt_pu_2013	MYB84
1500	4	2828054	rat_alt_pu_2013	-
1504	5	15541198	rat_alt_pu_2013	AT5G38810
1505	5	16478546	rat_alt_pu_2013	AT5G41170
1524	1	27073463	rat_anta_con_2013	AT1G09277
1525	2	1650188	rat_anta_con_2013	-
1526	2	5671604	rat_anta_con_2013	SLO2
1527	2	5671843	rat_anta_con_2013	SLO2
1528	2	5671703	rat_anta_con_2013	SLO2
1529	2	5672040	rat_anta_con_2013	SLO2
1530	2	5672495	rat_anta_con_2013	SLO2
1531	2	5672297	rat_anta_con_2013	SLO2
1532	2	5672696	rat_anta_con_2013	SLO2
1533	2	7494907	rat_anta_con_2013	EXL5
1534	3	8955292	rat_anta_con_2013	PERK3
1535	3	9500580	rat_anta_con_2013	AT3G25970
1536	3	11715783	rat_anta_con_2013	-
1537	3	19618822	rat_anta_con_2013	-
1538	2	5672878	rat_anta_con_2013	SLO2
1539	2	5673223	rat_anta_con_2013	SLO2
1540	3	9501144	rat_anta_con_2013	AT3G25970
1541	2	11327579	rat_anta_bu_2013	AT2G26630
1542	3	4162929	rat_anta_bu_2013	AT3G13010
1543	3	4163728	rat_anta_bu_2013	AT3G13010
1544	3	6513161	rat_anta_bu_2013	Tic62
1545	3	15807983	rat_anta_bu_2013	-
1546	3	20918464	rat_anta_bu_2013	AT3G56408
1547	3	20920512	rat_anta_bu_2013	AT3G56408
1548	4	7305435	rat_anta_bu_2013	AT4G12290
1549	5	5450599	rat_anta_bu_2013	TIC40
1550	5	25802201	rat_anta_bu_2013	AT5G64550
1551	3	4163825	rat_anta_bu_2013	AT3G13010
1552	3	20920480	rat_anta_bu_2013	AT3G56408
1553	3	20920625	rat_anta_bu_2013	AT3G56408
1554	4	7306252	rat_anta_bu_2013	AT4G12290
1555	3	6511452	rat_anta_eu_2013	Tic62
1556	3	17100921	rat_anta_eu_2013	AT3G46470
1557	4	17824861	rat_anta_eu_2013	mtHsc70-1
1558	5	18470665	rat_anta_eu_2013	AT5G45560
1559	5	18469740	rat_anta_eu_2013	AT5G45560
1560	5	18469949	rat_anta_eu_2013	AT5G45560
1561	5	18470163	rat_anta_eu_2013	AT5G45560
1562	3	6511851	rat_anta_eu_2013	Tic62
1563	3	6512236	rat_anta_eu_2013	Tic62
1564	3	6512440	rat_anta_eu_2013	Tic62
1565	3	6513208	rat_anta_eu_2013	Tic62
1566	3	6513860	rat_anta_eu_2013	Tic62
1567	5	18470798	rat_anta_eu_2013	AT5G45560
1568	3	13120890	rat_anta_gu_2013	AT3G32118
1556	3	17100921	rat_anta_gu_2013	AT3G46470
1556	3	17100921	rat_anta_pu_2013	AT3G46470
1558	5	18470665	rat_anta_pu_2013	AT5G45560
1559	5	18469740	rat_anta_pu_2013	AT5G45560
1560	5	18469949	rat_anta_pu_2013	AT5G45560
1561	5	18470163	rat_anta_pu_2013	AT5G45560
1567	5	18470798	rat_anta_pu_2013	AT5G45560
1524	1	27073463	rat_mutu_con_2013	AT1G09277
1569	2	2576235	rat_mutu_con_2013	-
1570	2	7491101	rat_mutu_con_2013	-
1571	3	8764450	rat_mutu_con_2013	-
1572	3	14681981	rat_mutu_con_2013	-
1573	3	16262212	rat_mutu_con_2013	AT3G44713
1574	3	18189954	rat_mutu_con_2013	AT3G49060
1575	4	7734976	rat_mutu_con_2013	TPS12
1576	5	14205245	rat_mutu_con_2013	AT5G36125
1577	5	15370287	rat_mutu_con_2013	AT5G38393
1578	5	18276212	rat_mutu_con_2013	AT5G45180
1579	5	18652132	rat_mutu_con_2013	AT5G45990
1580	5	18653402	rat_mutu_con_2013	AT5G45990
1581	5	18276233	rat_mutu_con_2013	AT5G45180
1582	5	18653506	rat_mutu_con_2013	AT5G45990
1583	1	11404449	rat_mutu_cu_2013	AFH14
1584	1	22444055	rat_mutu_cu_2013	-
1585	5	10774920	rat_mutu_cu_2013	-
1577	5	15370287	rat_mutu_cu_2013	AT5G38393
1586	1	12481302	rat_mutu_bu_2013	-
1587	1	25374079	rat_mutu_bu_2013	AT1G67700
1588	3	170804	rat_mutu_bu_2013	AT3G01450
1589	3	11681969	rat_mutu_bu_2013	AT3G29783
1289	3	15105390	rat_mutu_bu_2013	AT3G43128
1590	4	4250769	rat_mutu_bu_2013	-
1591	5	4585945	rat_mutu_bu_2013	HEMG2
1592	5	8541935	rat_mutu_bu_2013	FPF1
1569	2	2576235	rat_mutu_eu_2013	-
1571	3	8764450	rat_mutu_eu_2013	-
1589	3	11681969	rat_mutu_eu_2013	AT3G29783
1575	4	7734976	rat_mutu_eu_2013	TPS12
1593	1	7892584	rat_mutu_gu_2013	-
1524	1	27073463	rat_mutu_gu_2013	AT1G09277
1594	2	12986516	rat_mutu_gu_2013	-
1595	3	3691930	rat_mutu_gu_2013	-
1596	3	3847644	rat_mutu_gu_2013	-
1597	4	5211380	rat_mutu_gu_2013	-
1585	5	10774920	rat_mutu_gu_2013	-
1598	2	12989868	rat_mutu_gu_2013	AT2G30480
1599	2	12991855	rat_mutu_gu_2013	AT2G30480
1600	2	12992479	rat_mutu_gu_2013	AT2G30480
1583	1	11404449	rat_mutu_pu_2013	AFH14
1584	1	22444055	rat_mutu_pu_2013	-
1524	1	27073463	rat_mutu_pu_2013	AT1G09277
1585	5	10774920	rat_mutu_pu_2013	-
1601	4	15351278	rat_mutu_pu_2013	GLR2.4
1602	4	15351637	rat_mutu_pu_2013	GLR2.4
1603	4	15354112	rat_mutu_pu_2013	TAFII15
1604	4	15354569	rat_mutu_pu_2013	TAFII15
1605	4	15356050	rat_mutu_pu_2013	TAFII15
1606	4	15356214	rat_mutu_pu_2013	TAFII15
1607	5	15367996	rat_mutu_pu_2013	AT5G38390
1577	5	15370287	rat_mutu_pu_2013	AT5G38393
1608	4	15356328	rat_mutu_pu_2013	TAFII15

## Sheet: NM_2012
Supplemental Table 6 The list of significant SNPs in NM in 2012
NUM	CHR	Position	ENV	gene_name
345	1	20392395	ram_agg_con_2012	AT1G54590
346	1	21632198	ram_agg_con_2012	AT1G58310
347	1	21631535	ram_agg_con_2012	-
348	2	15443834	ram_agg_con_2012	-
349	2	17165544	ram_agg_con_2012	AT2G41178
350	3	454266	ram_agg_con_2012	AT3G02280
351	3	447957	ram_agg_con_2012	BIG
352	3	448003	ram_agg_con_2012	BIG
353	3	449023	ram_agg_con_2012	AT3G02270
354	3	450318	ram_agg_con_2012	AT3G02270
355	3	450439	ram_agg_con_2012	AT3G02270
356	3	453238	ram_agg_con_2012	-
357	3	453780	ram_agg_con_2012	AT3G02280
358	3	2668100	ram_agg_con_2012	AT3G08790
359	3	19444557	ram_agg_con_2012	-
360	4	2102724	ram_agg_con_2012	AT4G04313
361	4	4129996	ram_agg_con_2012	AT4G07331
362	4	8084772	ram_agg_con_2012	AT4G13990
363	4	8118704	ram_agg_con_2012	MEE48
364	4	10343767	ram_agg_con_2012	-
365	5	20441285	ram_agg_con_2012	-
366	1	21632237	ram_agg_con_2012	AT1G58310
367	1	21632694	ram_agg_con_2012	AT1G58310
368	1	21632856	ram_agg_con_2012	AT1G58310
369	3	455305	ram_agg_con_2012	AT3G02280
370	3	455600	ram_agg_con_2012	AT3G02280
371	1	21509169	ram_agg_cu_2012	-
372	2	10570319	ram_agg_cu_2012	-
373	3	12589399	ram_agg_cu_2012	-
374	3	12843486	ram_agg_cu_2012	AT3G31540
375	5	7129139	ram_agg_cu_2012	B73
376	2	12699684	ram_agg_bu_2012	AT2G29710
377	3	1537244	ram_agg_bu_2012	RLP31
378	4	2233874	ram_agg_bu_2012	CRK36
345	1	20392395	ram_agg_gu_2012	AT1G54590
379	1	22511171	ram_agg_gu_2012	AT1G61100
380	1	22511187	ram_agg_gu_2012	AT1G61100
381	4	7997243	ram_agg_gu_2012	AT4G13780
362	4	8084772	ram_agg_gu_2012	AT4G13990
382	1	22511298	ram_agg_gu_2012	AT1G61100
373	3	12589399	ram_agg_pu_2012	-
383	5	21218880	ram_agg_pu_2012	-
371	1	21509169	ram_alt_cu_2012	-
374	3	12843486	ram_alt_cu_2012	AT3G31540
384	1	16173403	ram_alt_bu_2012	-
385	1	26723616	ram_alt_bu_2012	AT1G70880
386	3	17275107	ram_alt_bu_2012	-
387	1	16174272	ram_alt_bu_2012	-
388	1	16157015	ram_alt_eu_2012	AT1G43020
389	1	16157384	ram_alt_eu_2012	AT1G43020
390	1	16156993	ram_alt_eu_2012	AT1G43020
391	4	6556671	ram_alt_eu_2012	-
392	5	14949318	ram_alt_eu_2012	EMB2656
393	1	16157758	ram_alt_eu_2012	AT1G43020
373	3	12589399	ram_alt_pu_2012	-
383	5	21218880	ram_alt_pu_2012	-
394	1	293313	ram_anta_con_2012	AT1G01800
395	1	1843276	ram_anta_con_2012	-
396	1	3170773	ram_anta_con_2012	COBL6
397	1	4266282	ram_anta_con_2012	-
398	1	4586786	ram_anta_con_2012	-
399	1	7345556	ram_anta_con_2012	-
400	1	7384441	ram_anta_con_2012	-
401	1	7455184	ram_anta_con_2012	-
402	1	7544962	ram_anta_con_2012	-
403	1	7545162	ram_anta_con_2012	AT1G21530
404	1	10150424	ram_anta_con_2012	AT1G29070
405	1	11715788	ram_anta_con_2012	NRT1.5
406	1	11754137	ram_anta_con_2012	AT1G32505
407	1	12948227	ram_anta_con_2012	AT1G35290
408	1	17708868	ram_anta_con_2012	-
409	1	20044908	ram_anta_con_2012	-
410	1	22352792	ram_anta_con_2012	AT1G60700
411	1	23474903	ram_anta_con_2012	AT1G63295
412	1	25574504	ram_anta_con_2012	AT1G68238
413	1	29811489	ram_anta_con_2012	AGC1.7
414	1	29915942	ram_anta_con_2012	AT1G79529
415	1	29916719	ram_anta_con_2012	GAPCP-1
416	1	29925809	ram_anta_con_2012	PGK
417	1	29957409	ram_anta_con_2012	AT1G79620
418	1	30022010	ram_anta_con_2012	TED3
419	1	30038832	ram_anta_con_2012	GL2
420	1	30063196	ram_anta_con_2012	-
421	1	30072469	ram_anta_con_2012	ATERDJ2A
422	1	30099310	ram_anta_con_2012	FRS8
423	1	30102922	ram_anta_con_2012	AT1G80020
424	1	30114844	ram_anta_con_2012	AT1G80060
425	2	350479	ram_anta_con_2012	-
426	2	689056	ram_anta_con_2012	-
427	2	2990590	ram_anta_con_2012	AT2G07210
428	2	2997832	ram_anta_con_2012	AT2G07213
429	2	3034268	ram_anta_con_2012	-
430	2	3199366	ram_anta_con_2012	AT2G05135
431	2	3518698	ram_anta_con_2012	ABCC13
432	2	3604027	ram_anta_con_2012	-
433	2	3813648	ram_anta_con_2012	AT2G10050
434	2	3901929	ram_anta_con_2012	-
435	2	4075067	ram_anta_con_2012	-
436	2	7306303	ram_anta_con_2012	AT2G16860
437	2	8852962	ram_anta_con_2012	-
438	3	5724248	ram_anta_con_2012	PUM24
439	3	10725532	ram_anta_con_2012	AT3G28610
440	3	11431748	ram_anta_con_2012	-
441	3	11444266	ram_anta_con_2012	AT3G29620
442	3	15344298	ram_anta_con_2012	-
443	3	15990167	ram_anta_con_2012	-
444	3	17754755	ram_anta_con_2012	AT3G48080
445	3	17884934	ram_anta_con_2012	-
446	3	17994197	ram_anta_con_2012	AT3G48550
447	3	17994398	ram_anta_con_2012	AT3G48550
448	3	19895832	ram_anta_con_2012	AT3G53680
449	4	154732	ram_anta_con_2012	ATI2
450	4	250918	ram_anta_con_2012	AT4G00585
451	4	600483	ram_anta_con_2012	-
452	4	712290	ram_anta_con_2012	AT4G01670
453	4	1322362	ram_anta_con_2012	BSM
454	4	1330749	ram_anta_con_2012	AT4G03010
455	4	1413127	ram_anta_con_2012	hemf2
456	4	1413745	ram_anta_con_2012	hemf2
457	4	1806643	ram_anta_con_2012	AT4G03860
458	4	2012397	ram_anta_con_2012	AT4G04167
459	4	2536779	ram_anta_con_2012	-
460	4	3582733	ram_anta_con_2012	AT4G06584
461	4	5029051	ram_anta_con_2012	-
462	4	5187908	ram_anta_con_2012	AT4G08230
463	4	7216352	ram_anta_con_2012	SAP7
464	4	14401717	ram_anta_con_2012	GGT4
465	4	14575568	ram_anta_con_2012	-
466	4	14604571	ram_anta_con_2012	EMB2757
467	4	14664049	ram_anta_con_2012	-
468	4	14669533	ram_anta_con_2012	AT4G29990
469	4	14668571	ram_anta_con_2012	AT4G29990
470	4	15402220	ram_anta_con_2012	ENODL15
471	4	15402659	ram_anta_con_2012	-
472	4	16067324	ram_anta_con_2012	AT4G33355
473	4	16077557	ram_anta_con_2012	AT4G33390
474	4	16105680	ram_anta_con_2012	AT4G33480
475	4	16111081	ram_anta_con_2012	RPD1
476	4	17161509	ram_anta_con_2012	AT4G36270
477	4	18078342	ram_anta_con_2012	AT4G38710
478	4	18259859	ram_anta_con_2012	APL3
479	4	18259395	ram_anta_con_2012	-
480	4	18259491	ram_anta_con_2012	-
481	4	18393506	ram_anta_con_2012	-
482	5	1061571	ram_anta_con_2012	CPSRP54
483	5	6381786	ram_anta_con_2012	-
484	5	7018291	ram_anta_con_2012	NPH4
485	5	7875922	ram_anta_con_2012	MIA40
486	5	9203903	ram_anta_con_2012	-
487	5	9503441	ram_anta_con_2012	AT5G27010
488	5	10528171	ram_anta_con_2012	-
489	5	13577909	ram_anta_con_2012	-
490	5	14047872	ram_anta_con_2012	-
491	5	17489977	ram_anta_con_2012	AT5G43530
492	5	18343724	ram_anta_con_2012	-
493	5	19416677	ram_anta_con_2012	-
494	5	20757164	ram_anta_con_2012	-
495	5	20797911	ram_anta_con_2012	AT5G51180
496	5	21601467	ram_anta_con_2012	AT5G53240
497	5	25733171	ram_anta_con_2012	SAC51
498	5	26085936	ram_anta_con_2012	AT5G65274
499	5	26149745	ram_anta_con_2012	GRF8
500	5	26244820	ram_anta_con_2012	-
501	5	26252326	ram_anta_con_2012	-
502	1	7459325	ram_anta_con_2012	-
503	1	7545912	ram_anta_con_2012	AT1G21530
504	1	29918367	ram_anta_con_2012	GAPCP-1
505	1	30063519	ram_anta_con_2012	HSP91
506	1	30078940	ram_anta_con_2012	AT1G79950
507	3	10726300	ram_anta_con_2012	AT3G28610
508	3	17994920	ram_anta_con_2012	-
509	4	1331921	ram_anta_con_2012	AT4G03020
510	4	14607564	ram_anta_con_2012	PIRL7
511	4	14670069	ram_anta_con_2012	-
512	4	16113689	ram_anta_con_2012	AT4G33500
513	4	18259891	ram_anta_con_2012	APL3
514	5	9504907	ram_anta_con_2012	AT5G27010
427	2	2990590	ram_anta_cu_2012	AT2G07210
515	3	20640866	ram_anta_cu_2012	AT3G55640
465	4	14575568	ram_anta_cu_2012	-
394	1	293313	ram_anta_bu_2012	AT1G01800
395	1	1843276	ram_anta_bu_2012	-
396	1	3170773	ram_anta_bu_2012	COBL6
397	1	4266282	ram_anta_bu_2012	-
398	1	4586786	ram_anta_bu_2012	-
399	1	7345556	ram_anta_bu_2012	-
400	1	7384441	ram_anta_bu_2012	-
402	1	7544962	ram_anta_bu_2012	-
403	1	7545162	ram_anta_bu_2012	AT1G21530
404	1	10150424	ram_anta_bu_2012	AT1G29070
405	1	11715788	ram_anta_bu_2012	NRT1.5
407	1	12948227	ram_anta_bu_2012	AT1G35290
409	1	20044908	ram_anta_bu_2012	-
410	1	22352792	ram_anta_bu_2012	AT1G60700
411	1	23474903	ram_anta_bu_2012	AT1G63295
413	1	29811489	ram_anta_bu_2012	AGC1.7
414	1	29915942	ram_anta_bu_2012	AT1G79529
415	1	29916719	ram_anta_bu_2012	GAPCP-1
416	1	29925809	ram_anta_bu_2012	PGK
417	1	29957409	ram_anta_bu_2012	AT1G79620
419	1	30038832	ram_anta_bu_2012	GL2
420	1	30063196	ram_anta_bu_2012	-
421	1	30072469	ram_anta_bu_2012	ATERDJ2A
422	1	30099310	ram_anta_bu_2012	FRS8
423	1	30102922	ram_anta_bu_2012	AT1G80020
424	1	30114844	ram_anta_bu_2012	AT1G80060
425	2	350479	ram_anta_bu_2012	-
426	2	689056	ram_anta_bu_2012	-
516	2	2974324	ram_anta_bu_2012	AT2G07160
427	2	2990590	ram_anta_bu_2012	AT2G07210
428	2	2997832	ram_anta_bu_2012	AT2G07213
429	2	3034268	ram_anta_bu_2012	-
430	2	3199366	ram_anta_bu_2012	AT2G05135
431	2	3518698	ram_anta_bu_2012	ABCC13
432	2	3604027	ram_anta_bu_2012	-
433	2	3813648	ram_anta_bu_2012	AT2G10050
434	2	3901929	ram_anta_bu_2012	-
435	2	4075067	ram_anta_bu_2012	-
517	2	5590720	ram_anta_bu_2012	AT2G13430
436	2	7306303	ram_anta_bu_2012	AT2G16860
437	2	8852962	ram_anta_bu_2012	-
518	2	14035515	ram_anta_bu_2012	AT2G33090
438	3	5724248	ram_anta_bu_2012	PUM24
439	3	10725532	ram_anta_bu_2012	AT3G28610
440	3	11431748	ram_anta_bu_2012	-
441	3	11444266	ram_anta_bu_2012	AT3G29620
443	3	15990167	ram_anta_bu_2012	-
444	3	17754755	ram_anta_bu_2012	AT3G48080
445	3	17884934	ram_anta_bu_2012	-
446	3	17994197	ram_anta_bu_2012	AT3G48550
447	3	17994398	ram_anta_bu_2012	AT3G48550
448	3	19895832	ram_anta_bu_2012	AT3G53680
449	4	154732	ram_anta_bu_2012	ATI2
519	4	234825	ram_anta_bu_2012	MYB3R2
450	4	250918	ram_anta_bu_2012	AT4G00585
451	4	600483	ram_anta_bu_2012	-
452	4	712290	ram_anta_bu_2012	AT4G01670
453	4	1322362	ram_anta_bu_2012	BSM
454	4	1330749	ram_anta_bu_2012	AT4G03010
455	4	1413127	ram_anta_bu_2012	hemf2
456	4	1413745	ram_anta_bu_2012	hemf2
457	4	1806643	ram_anta_bu_2012	AT4G03860
458	4	2012397	ram_anta_bu_2012	AT4G04167
459	4	2536779	ram_anta_bu_2012	-
460	4	3582733	ram_anta_bu_2012	AT4G06584
461	4	5029051	ram_anta_bu_2012	-
462	4	5187908	ram_anta_bu_2012	AT4G08230
463	4	7216352	ram_anta_bu_2012	SAP7
520	4	7444718	ram_anta_bu_2012	-
464	4	14401717	ram_anta_bu_2012	GGT4
465	4	14575568	ram_anta_bu_2012	-
466	4	14604571	ram_anta_bu_2012	EMB2757
467	4	14664049	ram_anta_bu_2012	-
468	4	14669533	ram_anta_bu_2012	AT4G29990
469	4	14668571	ram_anta_bu_2012	AT4G29990
470	4	15402220	ram_anta_bu_2012	ENODL15
473	4	16077557	ram_anta_bu_2012	AT4G33390
474	4	16105680	ram_anta_bu_2012	AT4G33480
475	4	16111081	ram_anta_bu_2012	RPD1
477	4	18078342	ram_anta_bu_2012	AT4G38710
478	4	18259859	ram_anta_bu_2012	APL3
479	4	18259395	ram_anta_bu_2012	-
480	4	18259491	ram_anta_bu_2012	-
481	4	18393506	ram_anta_bu_2012	-
482	5	1061571	ram_anta_bu_2012	CPSRP54
483	5	6381786	ram_anta_bu_2012	-
484	5	7018291	ram_anta_bu_2012	NPH4
485	5	7875922	ram_anta_bu_2012	MIA40
486	5	9203903	ram_anta_bu_2012	-
487	5	9503441	ram_anta_bu_2012	AT5G27010
488	5	10528171	ram_anta_bu_2012	-
489	5	13577909	ram_anta_bu_2012	-
490	5	14047872	ram_anta_bu_2012	-
491	5	17489977	ram_anta_bu_2012	AT5G43530
521	5	17878398	ram_anta_bu_2012	-
522	5	17950822	ram_anta_bu_2012	-
492	5	18343724	ram_anta_bu_2012	-
493	5	19416677	ram_anta_bu_2012	-
494	5	20757164	ram_anta_bu_2012	-
495	5	20797911	ram_anta_bu_2012	AT5G51180
496	5	21601467	ram_anta_bu_2012	AT5G53240
497	5	25733171	ram_anta_bu_2012	SAC51
498	5	26085936	ram_anta_bu_2012	AT5G65274
499	5	26149745	ram_anta_bu_2012	GRF8
500	5	26244820	ram_anta_bu_2012	-
501	5	26252326	ram_anta_bu_2012	-
503	1	7545912	ram_anta_bu_2012	AT1G21530
504	1	29918367	ram_anta_bu_2012	GAPCP-1
505	1	30063519	ram_anta_bu_2012	HSP91
506	1	30078940	ram_anta_bu_2012	AT1G79950
523	2	14036569	ram_anta_bu_2012	CSLD1
524	2	14038138	ram_anta_bu_2012	CSLD1
507	3	10726300	ram_anta_bu_2012	AT3G28610
508	3	17994920	ram_anta_bu_2012	-
509	4	1331921	ram_anta_bu_2012	AT4G03020
510	4	14607564	ram_anta_bu_2012	PIRL7
511	4	14670069	ram_anta_bu_2012	-
512	4	16113689	ram_anta_bu_2012	AT4G33500
513	4	18259891	ram_anta_bu_2012	APL3
514	5	9504907	ram_anta_bu_2012	AT5G27010
525	1	780337	ram_anta_eu_2012	AT1G04177
526	1	23079870	ram_anta_eu_2012	-
515	3	20640866	ram_anta_eu_2012	AT3G55640
527	4	6229226	ram_anta_eu_2012	AT4G09930
528	4	8230812	ram_anta_eu_2012	-
465	4	14575568	ram_anta_eu_2012	-
529	4	14592412	ram_anta_eu_2012	PLP8
530	4	14603370	ram_anta_eu_2012	EMB2757
466	4	14604571	ram_anta_eu_2012	EMB2757
531	4	14659490	ram_anta_eu_2012	AT4G29950
467	4	14664049	ram_anta_eu_2012	-
469	4	14668571	ram_anta_eu_2012	AT4G29990
468	4	14669533	ram_anta_eu_2012	AT4G29990
532	5	18734872	ram_anta_eu_2012	CUL4
533	4	14600619	ram_anta_eu_2012	MTO2
510	4	14607564	ram_anta_eu_2012	PIRL7
511	4	14670069	ram_anta_eu_2012	-
534	1	13482071	ram_anta_gu_2012	AT1G36078
535	1	13491696	ram_anta_gu_2012	AT1G36095
536	1	19128874	ram_anta_gu_2012	MNS1
537	2	1008570	ram_anta_gu_2012	AT2G03330
538	2	14071762	ram_anta_gu_2012	AT2G33205
539	3	14361263	ram_anta_gu_2012	-
540	3	14448484	ram_anta_gu_2012	AT3G42280
541	3	16683960	ram_anta_gu_2012	AT3G45480
542	4	13589623	ram_anta_gu_2012	PDIL5-4
543	4	13940897	ram_anta_gu_2012	UMAMIT33
544	5	6034111	ram_anta_gu_2012	AT5G18250
545	5	17919302	ram_anta_gu_2012	-
532	5	18734872	ram_anta_gu_2012	CUL4
546	2	1008622	ram_anta_gu_2012	AT2G03330
406	1	11754137	ram_anta_pu_2012	AT1G32505
547	1	29226878	ram_anta_pu_2012	-
548	1	29231415	ram_anta_pu_2012	AT1G77750
549	1	29354139	ram_anta_pu_2012	-
550	1	29354300	ram_anta_pu_2012	-
551	1	29355538	ram_anta_pu_2012	AT1G78070
552	1	29354875	ram_anta_pu_2012	-
553	1	29355290	ram_anta_pu_2012	AT1G78070
554	1	29355945	ram_anta_pu_2012	AT1G78070
555	1	29356280	ram_anta_pu_2012	AT1G78070
556	1	29356439	ram_anta_pu_2012	AT1G78070
557	1	29357329	ram_anta_pu_2012	AT1G78070
558	1	29357921	ram_anta_pu_2012	AT1G78070
559	1	29358173	ram_anta_pu_2012	AT1G78070
560	1	29432453	ram_anta_pu_2012	AT1G78230
561	1	29434270	ram_anta_pu_2012	TSD2
427	2	2990590	ram_anta_pu_2012	AT2G07210
432	2	3604027	ram_anta_pu_2012	-
562	2	18210302	ram_anta_pu_2012	ITPK4
563	3	14621770	ram_anta_pu_2012	-
515	3	20640866	ram_anta_pu_2012	AT3G55640
528	4	8230812	ram_anta_pu_2012	-
465	4	14575568	ram_anta_pu_2012	-
466	4	14604571	ram_anta_pu_2012	EMB2757
467	4	14664049	ram_anta_pu_2012	-
468	4	14669533	ram_anta_pu_2012	AT4G29990
469	4	14668571	ram_anta_pu_2012	AT4G29990
471	4	15402659	ram_anta_pu_2012	-
564	5	565810	ram_anta_pu_2012	AT5G02530
545	5	17919302	ram_anta_pu_2012	-
565	5	21605527	ram_anta_pu_2012	AT5G53260
566	1	29235922	ram_anta_pu_2012	NIA1
567	1	29358371	ram_anta_pu_2012	AT1G78070
568	1	29435591	ram_anta_pu_2012	TSD2
510	4	14607564	ram_anta_pu_2012	PIRL7
511	4	14670069	ram_anta_pu_2012	-
569	1	22902143	ram_mutu_con_2012	CPK19
570	1	24119449	ram_mutu_con_2012	-
571	1	26981409	ram_mutu_con_2012	-
572	2	3554017	ram_mutu_con_2012	AT2G07790
573	2	17343668	ram_mutu_con_2012	AT2G41590
574	3	10729162	ram_mutu_con_2012	AT3G28630
575	3	10745276	ram_mutu_con_2012	AT3G28670
576	3	10745763	ram_mutu_con_2012	AT3G28670
577	4	798162	ram_mutu_con_2012	SAM-2
578	4	854376	ram_mutu_con_2012	STS
579	4	2010113	ram_mutu_con_2012	-
580	4	9469646	ram_mutu_con_2012	-
581	4	9987850	ram_mutu_con_2012	-
582	4	12126038	ram_mutu_con_2012	CRK7
583	5	4243598	ram_mutu_con_2012	AT5G13260
584	5	4381821	ram_mutu_con_2012	AT5G13600
585	5	4423934	ram_mutu_con_2012	SMT1
586	3	10746498	ram_mutu_con_2012	AT3G28670
587	5	4382426	ram_mutu_con_2012	AT5G13600
570	1	24119449	ram_mutu_cu_2012	-
572	2	3554017	ram_mutu_cu_2012	AT2G07790
574	3	10729162	ram_mutu_cu_2012	AT3G28630
575	3	10745276	ram_mutu_cu_2012	AT3G28670
576	3	10745763	ram_mutu_cu_2012	AT3G28670
588	4	8987279	ram_mutu_cu_2012	HSBP
589	4	9249973	ram_mutu_cu_2012	OPT3
590	4	9259525	ram_mutu_cu_2012	SVR7
591	4	9260039	ram_mutu_cu_2012	SVR7
592	4	9260006	ram_mutu_cu_2012	SVR7
593	4	9261240	ram_mutu_cu_2012	AT4G16400
594	4	9263372	ram_mutu_cu_2012	ADA2B
595	4	9263716	ram_mutu_cu_2012	ADA2B
596	4	9292285	ram_mutu_cu_2012	INT4
597	4	9309784	ram_mutu_cu_2012	-
598	4	9312422	ram_mutu_cu_2012	AT4G16530
599	4	9356541	ram_mutu_cu_2012	-
600	4	9396861	ram_mutu_cu_2012	PSD1
601	4	9423408	ram_mutu_cu_2012	-
602	4	9449455	ram_mutu_cu_2012	HB-2
580	4	9469646	ram_mutu_cu_2012	-
603	4	9525957	ram_mutu_cu_2012	AT4G06440
604	4	9612141	ram_mutu_cu_2012	AT4G17100
605	4	9624120	ram_mutu_cu_2012	AT4G17140
606	4	9706122	ram_mutu_cu_2012	AT4G17370
582	4	12126038	ram_mutu_cu_2012	CRK7
584	5	4381821	ram_mutu_cu_2012	AT5G13600
586	3	10746498	ram_mutu_cu_2012	AT3G28670
607	4	8988188	ram_mutu_cu_2012	HSBP
608	4	9263830	ram_mutu_cu_2012	ADA2B
587	5	4382426	ram_mutu_cu_2012	AT5G13600
609	1	1856068	ram_mutu_bu_2012	AT1G06120
610	1	3861366	ram_mutu_bu_2012	-
611	1	4351932	ram_mutu_bu_2012	EMB1586
612	1	5344153	ram_mutu_bu_2012	-
613	1	9983642	ram_mutu_bu_2012	HB-1
614	1	10025706	ram_mutu_bu_2012	AT1G28510
615	1	10328241	ram_mutu_bu_2012	AT1G29535
616	1	10384267	ram_mutu_bu_2012	AT1G06293
617	1	10776615	ram_mutu_bu_2012	-
618	1	10819622	ram_mutu_bu_2012	AT1G30545
619	1	11357695	ram_mutu_bu_2012	AT1G31720
620	1	11377654	ram_mutu_bu_2012	ABCG14
621	1	11379034	ram_mutu_bu_2012	AT1G31772
622	1	11385680	ram_mutu_bu_2012	-
623	1	13311961	ram_mutu_bu_2012	-
624	1	14248855	ram_mutu_bu_2012	-
625	1	14453023	ram_mutu_bu_2012	-
626	1	15537558	ram_mutu_bu_2012	-
627	1	17306917	ram_mutu_bu_2012	CYCA3;4
628	1	17308340	ram_mutu_bu_2012	CYCA3;4
629	1	20869795	ram_mutu_bu_2012	AT1G55830
630	1	21137785	ram_mutu_bu_2012	NAS4
631	1	21141433	ram_mutu_bu_2012	TPR5
632	1	22352716	ram_mutu_bu_2012	AT1G60700
410	1	22352792	ram_mutu_bu_2012	AT1G60700
633	1	22353314	ram_mutu_bu_2012	AT1G60700
634	1	22363527	ram_mutu_bu_2012	AT1G60750
635	1	23484138	ram_mutu_bu_2012	AT1G63300
636	1	23484921	ram_mutu_bu_2012	AT1G63300
637	1	23485032	ram_mutu_bu_2012	AT1G63300
638	1	24022972	ram_mutu_bu_2012	ENODL8
639	1	24025762	ram_mutu_bu_2012	AT1G64650
640	1	24039154	ram_mutu_bu_2012	BLT
641	1	24129689	ram_mutu_bu_2012	-
642	1	24144345	ram_mutu_bu_2012	GTG1
643	1	25921145	ram_mutu_bu_2012	-
644	1	25921365	ram_mutu_bu_2012	AT1G09023
645	1	25928586	ram_mutu_bu_2012	-
646	1	25938682	ram_mutu_bu_2012	MGP3
647	1	25944107	ram_mutu_bu_2012	BIM2
648	1	25944466	ram_mutu_bu_2012	AT1G69020
649	2	2295231	ram_mutu_bu_2012	AT2G00430
650	2	2300900	ram_mutu_bu_2012	-
651	2	2298655	ram_mutu_bu_2012	AT2G05950
652	2	2299981	ram_mutu_bu_2012	-
653	2	2305212	ram_mutu_bu_2012	AT2G05960
654	2	2325114	ram_mutu_bu_2012	MOD1
655	2	2327862	ram_mutu_bu_2012	AT2G06000
656	2	2328086	ram_mutu_bu_2012	AT2G06000
657	2	2328642	ram_mutu_bu_2012	AT2G06000
658	2	2337914	ram_mutu_bu_2012	ORG4
659	2	2338148	ram_mutu_bu_2012	ORG4
660	2	2345116	ram_mutu_bu_2012	AT2G06020
661	2	2433976	ram_mutu_bu_2012	ELF8
662	2	2441369	ram_mutu_bu_2012	-
663	2	2441703	ram_mutu_bu_2012	AT2G06235
664	2	2444273	ram_mutu_bu_2012	-
665	2	2445907	ram_mutu_bu_2012	AT2G06240
666	2	2522200	ram_mutu_bu_2012	-
667	2	2515520	ram_mutu_bu_2012	-
668	2	2522420	ram_mutu_bu_2012	-
669	2	2536548	ram_mutu_bu_2012	-
670	2	2589760	ram_mutu_bu_2012	VPS2.1
671	2	2697369	ram_mutu_bu_2012	-
672	2	2742865	ram_mutu_bu_2012	AT2G06830
277	2	2819353	ram_mutu_bu_2012	AT2G06910
516	2	2974324	ram_mutu_bu_2012	AT2G07160
517	2	5590720	ram_mutu_bu_2012	AT2G13430
673	2	8177544	ram_mutu_bu_2012	VEL2
674	2	9761395	ram_mutu_bu_2012	-
104	2	10578032	ram_mutu_bu_2012	AT2G24830
675	2	10864413	ram_mutu_bu_2012	AT2G25530
676	2	11949234	ram_mutu_bu_2012	-
677	2	12140143	ram_mutu_bu_2012	AT2G28390
518	2	14035515	ram_mutu_bu_2012	AT2G33090
523	2	14036569	ram_mutu_bu_2012	CSLD1
524	2	14038138	ram_mutu_bu_2012	CSLD1
678	2	15785230	ram_mutu_bu_2012	-
679	2	16743703	ram_mutu_bu_2012	AT2G40095
680	3	523203	ram_mutu_bu_2012	AT3G02510
681	3	535770	ram_mutu_bu_2012	RAD23C
682	3	547787	ram_mutu_bu_2012	STE1
683	3	1325265	ram_mutu_bu_2012	AT3G04820
684	3	4478594	ram_mutu_bu_2012	AT3G13680
685	3	6254386	ram_mutu_bu_2012	AT3G18235
686	3	7952901	ram_mutu_bu_2012	IGPD
687	3	7957260	ram_mutu_bu_2012	AT3G22430
688	3	10357761	ram_mutu_bu_2012	AT3G27910
689	3	10467171	ram_mutu_bu_2012	UMAMIT44
690	3	10468233	ram_mutu_bu_2012	UMAMIT44
691	3	11203357	ram_mutu_bu_2012	-
440	3	11431748	ram_mutu_bu_2012	-
692	3	13171869	ram_mutu_bu_2012	-
693	3	15697200	ram_mutu_bu_2012	AT3G43835
694	3	15809899	ram_mutu_bu_2012	AT3G44035
695	3	16165543	ram_mutu_bu_2012	CYP71
696	3	16383697	ram_mutu_bu_2012	ACD1
697	3	16557899	ram_mutu_bu_2012	AT3G45210
698	3	16566264	ram_mutu_bu_2012	AT3G45220
699	3	17583990	ram_mutu_bu_2012	MAG2
700	3	20474140	ram_mutu_bu_2012	AT3G55240
701	3	23184226	ram_mutu_bu_2012	-
519	4	234825	ram_mutu_bu_2012	MYB3R2
702	4	1625575	ram_mutu_bu_2012	AT4G03660
703	4	2109481	ram_mutu_bu_2012	AT4G04316
704	4	2263050	ram_mutu_bu_2012	-
705	4	3115700	ram_mutu_bu_2012	-
706	4	4784013	ram_mutu_bu_2012	AT4G07943
707	4	4872999	ram_mutu_bu_2012	-
708	4	5007611	ram_mutu_bu_2012	-
709	4	5089488	ram_mutu_bu_2012	-
710	4	5115978	ram_mutu_bu_2012	-
711	4	6121019	ram_mutu_bu_2012	CTC1
712	4	6229373	ram_mutu_bu_2012	AT4G09930
713	4	6677312	ram_mutu_bu_2012	-
714	3	7119760	ram_mutu_bu_2012	RTL2
715	4	7178214	ram_mutu_bu_2012	-
716	4	8862930	ram_mutu_bu_2012	AT4G15520
717	4	9646639	ram_mutu_bu_2012	AT4G17180
718	4	9647011	ram_mutu_bu_2012	AT4G17180
719	4	9649496	ram_mutu_bu_2012	FPS2
720	4	10698150	ram_mutu_bu_2012	NPR4
721	4	10700893	ram_mutu_bu_2012	AT4G19670
722	4	10964326	ram_mutu_bu_2012	-
723	4	11400966	ram_mutu_bu_2012	CRK28
724	4	12569924	ram_mutu_bu_2012	-
725	4	13946133	ram_mutu_bu_2012	AT4G28070
465	4	14575568	ram_mutu_bu_2012	-
466	4	14604571	ram_mutu_bu_2012	EMB2757
467	4	14664049	ram_mutu_bu_2012	-
468	4	14669533	ram_mutu_bu_2012	AT4G29990
469	4	14668571	ram_mutu_bu_2012	AT4G29990
726	4	17561511	ram_mutu_bu_2012	CYP81D5
727	4	18001134	ram_mutu_bu_2012	STY46
728	4	18165504	ram_mutu_bu_2012	FBA2
729	5	149338	ram_mutu_bu_2012	TBL3
730	5	4913335	ram_mutu_bu_2012	-
731	5	6832018	ram_mutu_bu_2012	AT5G00425
732	5	6909572	ram_mutu_bu_2012	AT5G20440
733	5	6950804	ram_mutu_bu_2012	BRXL4
734	5	6955450	ram_mutu_bu_2012	AT5G20560
735	5	6965526	ram_mutu_bu_2012	TBL5
736	5	7001996	ram_mutu_bu_2012	TBL16
737	5	7061226	ram_mutu_bu_2012	AT5G20840
738	5	7087473	ram_mutu_bu_2012	AT5G20890
739	5	7102829	ram_mutu_bu_2012	TSL
740	5	7108503	ram_mutu_bu_2012	AT5G20950
741	5	7127855	ram_mutu_bu_2012	MS3
742	5	7186291	ram_mutu_bu_2012	AT5G21130
743	5	7186486	ram_mutu_bu_2012	AT5G21130
744	5	7186663	ram_mutu_bu_2012	AT5G21130
745	5	7196969	ram_mutu_bu_2012	AGO9
746	5	7213492	ram_mutu_bu_2012	AT5G21222
747	5	8334949	ram_mutu_bu_2012	-
748	5	9054358	ram_mutu_bu_2012	AT5G25940
749	5	9745364	ram_mutu_bu_2012	LACS7
750	5	9788635	ram_mutu_bu_2012	AT5G27650
751	5	9789082	ram_mutu_bu_2012	AT5G27650
752	5	9789664	ram_mutu_bu_2012	DEG14
753	5	9789879	ram_mutu_bu_2012	DEG14
754	5	9790110	ram_mutu_bu_2012	DEG14
755	5	9790538	ram_mutu_bu_2012	DEG14
756	5	9791001	ram_mutu_bu_2012	DEG14
757	5	9791160	ram_mutu_bu_2012	DEG14
758	5	9792766	ram_mutu_bu_2012	HTA7
759	5	9826792	ram_mutu_bu_2012	EMB2775
760	5	11210196	ram_mutu_bu_2012	AT5G29565
761	5	15040207	ram_mutu_bu_2012	-
762	5	15893664	ram_mutu_bu_2012	-
763	5	16336184	ram_mutu_bu_2012	-
764	5	17470604	ram_mutu_bu_2012	ARP9
521	5	17878398	ram_mutu_bu_2012	-
522	5	17950822	ram_mutu_bu_2012	-
765	5	18037143	ram_mutu_bu_2012	GSO2
766	5	18806910	ram_mutu_bu_2012	KCO3
767	5	18814574	ram_mutu_bu_2012	AT5G46380
768	5	18821725	ram_mutu_bu_2012	PRP39-2
769	5	19990459	ram_mutu_bu_2012	AT5G49305
770	5	21400314	ram_mutu_bu_2012	AT5G52810
771	5	21428641	ram_mutu_bu_2012	MAKR5
772	5	23495588	ram_mutu_bu_2012	SVL4
773	5	23878592	ram_mutu_bu_2012	-
774	5	26011048	ram_mutu_bu_2012	ACX2
775	5	26382344	ram_mutu_bu_2012	AT5G65950
776	5	26540790	ram_mutu_bu_2012	MAN7
777	1	9985910	ram_mutu_bu_2012	HB-1
778	1	10779874	ram_mutu_bu_2012	AT1G30470
779	1	23485977	ram_mutu_bu_2012	AT1G63300
780	1	25946906	ram_mutu_bu_2012	AT1G69020
781	2	2305438	ram_mutu_bu_2012	AT2G05960
782	2	2329509	ram_mutu_bu_2012	AT2G06000
783	2	2345590	ram_mutu_bu_2012	AT2G06020
784	2	2436190	ram_mutu_bu_2012	ELF8
785	2	2447233	ram_mutu_bu_2012	AT2G06240
786	2	2526540	ram_mutu_bu_2012	AT2G06400
787	2	10866934	ram_mutu_bu_2012	AT2G25530
788	2	14042724	ram_mutu_bu_2012	VAMP723
789	3	7957786	ram_mutu_bu_2012	AT3G22430
790	3	10468365	ram_mutu_bu_2012	UMAMIT44
791	4	4874609	ram_mutu_bu_2012	-
792	3	7119823	ram_mutu_bu_2012	RTL2
793	4	9648153	ram_mutu_bu_2012	AT4G17180
510	4	14607564	ram_mutu_bu_2012	PIRL7
511	4	14670069	ram_mutu_bu_2012	-
794	4	18001428	ram_mutu_bu_2012	STY46
795	5	7188410	ram_mutu_bu_2012	emb1379
796	5	9791892	ram_mutu_bu_2012	DEG14
797	5	9826941	ram_mutu_bu_2012	EMB2775
611	1	4351932	ram_mutu_eu_2012	EMB1586
569	1	22902143	ram_mutu_eu_2012	CPK19
570	1	24119449	ram_mutu_eu_2012	-
571	1	26981409	ram_mutu_eu_2012	-
798	2	3870140	ram_mutu_eu_2012	AT2G10180
799	2	5513005	ram_mutu_eu_2012	AT2G13290
800	2	8264080	ram_mutu_eu_2012	AT2G19080
573	2	17343668	ram_mutu_eu_2012	AT2G41590
574	3	10729162	ram_mutu_eu_2012	AT3G28630
801	3	10741762	ram_mutu_eu_2012	-
575	3	10745276	ram_mutu_eu_2012	AT3G28670
576	3	10745763	ram_mutu_eu_2012	AT3G28670
802	4	236671	ram_mutu_eu_2012	MYB3R2
577	4	798162	ram_mutu_eu_2012	SAM-2
578	4	854376	ram_mutu_eu_2012	STS
579	4	2010113	ram_mutu_eu_2012	-
580	4	9469646	ram_mutu_eu_2012	-
581	4	9987850	ram_mutu_eu_2012	-
582	4	12126038	ram_mutu_eu_2012	CRK7
724	4	12569924	ram_mutu_eu_2012	-
465	4	14575568	ram_mutu_eu_2012	-
583	5	4243598	ram_mutu_eu_2012	AT5G13260
584	5	4381821	ram_mutu_eu_2012	AT5G13600
803	5	4422761	ram_mutu_eu_2012	PAO1
804	5	4419778	ram_mutu_eu_2012	CYL1
805	5	4420488	ram_mutu_eu_2012	PAO1
585	5	4423934	ram_mutu_eu_2012	SMT1
806	5	7364502	ram_mutu_eu_2012	E2F1
545	5	17919302	ram_mutu_eu_2012	-
807	5	21846701	ram_mutu_eu_2012	-
808	5	23288500	ram_mutu_eu_2012	-
809	2	5513074	ram_mutu_eu_2012	AT2G13290
810	2	8265581	ram_mutu_eu_2012	AT2G19090
586	3	10746498	ram_mutu_eu_2012	AT3G28670
587	5	4382426	ram_mutu_eu_2012	AT5G13600
811	5	4423196	ram_mutu_eu_2012	-
570	1	24119449	ram_mutu_gu_2012	-
812	1	26932955	ram_mutu_gu_2012	AT1G71480
539	3	14361263	ram_mutu_gu_2012	-
588	4	8987279	ram_mutu_gu_2012	HSBP
590	4	9259525	ram_mutu_gu_2012	SVR7
591	4	9260039	ram_mutu_gu_2012	SVR7
592	4	9260006	ram_mutu_gu_2012	SVR7
593	4	9261240	ram_mutu_gu_2012	AT4G16400
594	4	9263372	ram_mutu_gu_2012	ADA2B
595	4	9263716	ram_mutu_gu_2012	ADA2B
596	4	9292285	ram_mutu_gu_2012	INT4
597	4	9309784	ram_mutu_gu_2012	-
598	4	9312422	ram_mutu_gu_2012	AT4G16530
599	4	9356541	ram_mutu_gu_2012	-
600	4	9396861	ram_mutu_gu_2012	PSD1
601	4	9423408	ram_mutu_gu_2012	-
602	4	9449455	ram_mutu_gu_2012	HB-2
580	4	9469646	ram_mutu_gu_2012	-
603	4	9525957	ram_mutu_gu_2012	AT4G06440
605	4	9624120	ram_mutu_gu_2012	AT4G17140
606	4	9706122	ram_mutu_gu_2012	AT4G17370
813	4	10591298	ram_mutu_gu_2012	AT4G19420
814	4	10593478	ram_mutu_gu_2012	AT4G03015
721	4	10700893	ram_mutu_gu_2012	AT4G19670
815	4	10703540	ram_mutu_gu_2012	IRT2
582	4	12126038	ram_mutu_gu_2012	CRK7
816	5	8949295	ram_mutu_gu_2012	AT5G25630
817	5	8947486	ram_mutu_gu_2012	AT5G25630
607	4	8988188	ram_mutu_gu_2012	HSBP
608	4	9263830	ram_mutu_gu_2012	ADA2B
818	4	10594987	ram_mutu_gu_2012	-
819	4	10706441	ram_mutu_gu_2012	-
820	5	8949781	ram_mutu_gu_2012	AT5G25640
570	1	24119449	ram_mutu_pu_2012	-
573	2	17343668	ram_mutu_pu_2012	AT2G41590
574	3	10729162	ram_mutu_pu_2012	AT3G28630
575	3	10745276	ram_mutu_pu_2012	AT3G28670
576	3	10745763	ram_mutu_pu_2012	AT3G28670
577	4	798162	ram_mutu_pu_2012	SAM-2
590	4	9259525	ram_mutu_pu_2012	SVR7
591	4	9260039	ram_mutu_pu_2012	SVR7
592	4	9260006	ram_mutu_pu_2012	SVR7
593	4	9261240	ram_mutu_pu_2012	AT4G16400
594	4	9263372	ram_mutu_pu_2012	ADA2B
595	4	9263716	ram_mutu_pu_2012	ADA2B
596	4	9292285	ram_mutu_pu_2012	INT4
597	4	9309784	ram_mutu_pu_2012	-
598	4	9312422	ram_mutu_pu_2012	AT4G16530
599	4	9356541	ram_mutu_pu_2012	-
600	4	9396861	ram_mutu_pu_2012	PSD1
601	4	9423408	ram_mutu_pu_2012	-
602	4	9449455	ram_mutu_pu_2012	HB-2
580	4	9469646	ram_mutu_pu_2012	-
603	4	9525957	ram_mutu_pu_2012	AT4G06440
605	4	9624120	ram_mutu_pu_2012	AT4G17140
581	4	9987850	ram_mutu_pu_2012	-
813	4	10591298	ram_mutu_pu_2012	AT4G19420
814	4	10593478	ram_mutu_pu_2012	AT4G03015
721	4	10700893	ram_mutu_pu_2012	AT4G19670
815	4	10703540	ram_mutu_pu_2012	IRT2
582	4	12126038	ram_mutu_pu_2012	CRK7
584	5	4381821	ram_mutu_pu_2012	AT5G13600
586	3	10746498	ram_mutu_pu_2012	AT3G28670
608	4	9263830	ram_mutu_pu_2012	ADA2B
818	4	10594987	ram_mutu_pu_2012	-
819	4	10706441	ram_mutu_pu_2012	-
587	5	4382426	ram_mutu_pu_2012	AT5G13600

## Sheet: NM_2013
Supplemental Table 6 The list of significant SNPs in NM in 2013
NUM	CHR	Position	ENV	gene_name
1609	1	26164919	ram_agg_con_2013	-
1610	2	12808564	ram_agg_con_2013	TBL45
1611	4	2221047	ram_agg_con_2013	WRKY42
1612	4	2223507	ram_agg_con_2013	-
1613	5	3585261	ram_agg_con_2013	AT5G11240
1614	5	3583207	ram_agg_con_2013	AT5G11240
1615	5	3583755	ram_agg_con_2013	AT5G11240
1616	5	3584395	ram_agg_con_2013	AT5G11240
1617	5	3585054	ram_agg_con_2013	AT5G11240
1618	5	3585544	ram_agg_con_2013	AT5G11240
1619	5	3582878	ram_agg_con_2013	AT5G11240
1620	5	3586252	ram_agg_con_2013	AT5G11240
1621	5	3585695	ram_agg_con_2013	AT5G11240
1622	5	15057934	ram_agg_con_2013	OXP1
1623	5	22790868	ram_agg_con_2013	PEX5
1624	5	23411074	ram_agg_con_2013	-
1625	5	3586778	ram_agg_con_2013	AT5G11240
1626	5	3586892	ram_agg_con_2013	AT5G11240
1627	5	3587937	ram_agg_con_2013	-
1628	5	3587980	ram_agg_con_2013	AT5G11250
1629	5	3588336	ram_agg_con_2013	AT5G11250
1630	5	15058501	ram_agg_con_2013	OXP1
1631	1	655770	ram_agg_cu_2013	LPA1
1632	1	11963566	ram_agg_cu_2013	AT1G33020
1633	1	12187150	ram_agg_cu_2013	AT1G33607
1634	4	12958027	ram_agg_cu_2013	AT4G25330
1635	3	17149178	ram_agg_eu_2013	MBD5
1618	5	3585544	ram_agg_eu_2013	AT5G11240
1619	5	3582878	ram_agg_eu_2013	AT5G11240
1614	5	3583207	ram_agg_eu_2013	AT5G11240
1615	5	3583755	ram_agg_eu_2013	AT5G11240
1616	5	3584395	ram_agg_eu_2013	AT5G11240
1617	5	3585054	ram_agg_eu_2013	AT5G11240
1613	5	3585261	ram_agg_eu_2013	AT5G11240
1623	5	22790868	ram_agg_eu_2013	PEX5
1621	5	3585695	ram_agg_eu_2013	AT5G11240
1620	5	3586252	ram_agg_eu_2013	AT5G11240
1625	5	3586778	ram_agg_eu_2013	AT5G11240
1626	5	3586892	ram_agg_eu_2013	AT5G11240
1627	5	3587937	ram_agg_eu_2013	-
1636	1	25990765	ram_agg_gu_2013	-
1637	3	3371086	ram_agg_gu_2013	AT3G10760
1638	4	687995	ram_agg_gu_2013	AT4G03905
1611	4	2221047	ram_agg_gu_2013	WRKY42
1612	4	2223507	ram_agg_gu_2013	-
1623	5	22790868	ram_agg_gu_2013	PEX5
1632	1	11963566	ram_agg_pu_2013	AT1G33020
1634	4	12958027	ram_agg_pu_2013	AT4G25330
1632	1	11963566	ram_alt_cu_2013	AT1G33020
1634	4	12958027	ram_alt_cu_2013	AT4G25330
1639	5	19948477	ram_alt_cu_2013	AT5G49200
1640	5	19948859	ram_alt_cu_2013	AT5G49200
1641	1	29634694	ram_alt_bu_2013	AT1G78820
1642	4	15591926	ram_alt_bu_2013	-
1632	1	11963566	ram_alt_pu_2013	AT1G33020
1633	1	12187150	ram_alt_pu_2013	AT1G33607
1634	4	12958027	ram_alt_pu_2013	AT4G25330
1643	5	17912966	ram_alt_pu_2013	-
1644	5	17913080	ram_alt_pu_2013	-
1645	1	19992174	ram_anta_con_2013	GLY3
1646	2	5003869	ram_anta_con_2013	-
1647	2	5010891	ram_anta_con_2013	AT2G12405
1648	3	6754524	ram_anta_con_2013	AT3G19480
1476	3	16954412	ram_anta_con_2013	UTR5
1649	4	2761209	ram_anta_con_2013	AT4G05460
1650	4	2761133	ram_anta_con_2013	AT4G05460
1651	4	17058254	ram_anta_con_2013	CPK18
1652	5	8515310	ram_anta_con_2013	BZIP9
1653	5	8514691	ram_anta_con_2013	-
1654	5	8515711	ram_anta_con_2013	BZIP9
1655	5	8515337	ram_anta_con_2013	BZIP9
1656	5	8515397	ram_anta_con_2013	BZIP9
1657	5	8515532	ram_anta_con_2013	BZIP9
1658	5	8515581	ram_anta_con_2013	BZIP9
1659	5	8516753	ram_anta_con_2013	AT5G24810
1660	5	8515823	ram_anta_con_2013	BZIP9
1661	5	8519899	ram_anta_con_2013	AT5G24810
1662	5	8517411	ram_anta_con_2013	AT5G24810
1663	5	8518323	ram_anta_con_2013	AT5G24810
1664	5	8518350	ram_anta_con_2013	AT5G24810
1665	5	8518997	ram_anta_con_2013	AT5G24810
1666	5	15766269	ram_anta_con_2013	PTEN1
1478	3	16954881	ram_anta_con_2013	UTR5
1479	3	16955150	ram_anta_con_2013	UTR5
1667	4	2761255	ram_anta_con_2013	AT4G05460
1668	4	2761293	ram_anta_con_2013	AT4G05460
1669	4	2761833	ram_anta_con_2013	AT4G05460
1670	5	8520293	ram_anta_con_2013	AT5G24810
1671	5	8520467	ram_anta_con_2013	AT5G24810
1672	5	8522788	ram_anta_con_2013	AT5G24810
1673	5	8525213	ram_anta_con_2013	AT5G24820
1674	1	20046434	ram_anta_cu_2013	-
1675	1	22524202	ram_anta_cu_2013	TPS04
1676	2	4859379	ram_anta_cu_2013	-
1666	5	15766269	ram_anta_cu_2013	PTEN1
1677	1	1881221	ram_anta_bu_2013	-
1678	1	3879067	ram_anta_bu_2013	XTH8
1679	2	5914881	ram_anta_bu_2013	AT2G14060
1680	3	15233163	ram_anta_bu_2013	-
1476	3	16954412	ram_anta_bu_2013	UTR5
1681	5	1117554	ram_anta_bu_2013	-
1682	5	2768761	ram_anta_bu_2013	ILP1
1683	5	2766544	ram_anta_bu_2013	ILP1
1684	5	2767945	ram_anta_bu_2013	ILP1
1685	5	2776498	ram_anta_bu_2013	AT5G08565
1686	5	16537735	ram_anta_bu_2013	AT5G41330
1478	3	16954881	ram_anta_bu_2013	UTR5
1479	3	16955150	ram_anta_bu_2013	UTR5
1687	5	2769911	ram_anta_bu_2013	ILP1
1688	5	2776845	ram_anta_bu_2013	AT5G08565
1674	1	20046434	ram_anta_eu_2013	-
1689	1	23368361	ram_anta_eu_2013	ddf2
1649	4	2761209	ram_anta_eu_2013	AT4G05460
1650	4	2761133	ram_anta_eu_2013	AT4G05460
1666	5	15766269	ram_anta_eu_2013	PTEN1
1690	1	23369410	ram_anta_eu_2013	-
1691	1	23369732	ram_anta_eu_2013	-
1692	1	23371761	ram_anta_eu_2013	AT1G63040
1693	1	23372126	ram_anta_eu_2013	-
1694	1	23372693	ram_anta_eu_2013	-
1667	4	2761255	ram_anta_eu_2013	AT4G05460
1668	4	2761293	ram_anta_eu_2013	AT4G05460
1669	4	2761833	ram_anta_eu_2013	AT4G05460
1674	1	20046434	ram_anta_gu_2013	-
1695	1	22263209	ram_anta_gu_2013	AT1G60420
1696	1	24208844	ram_anta_gu_2013	-
1697	2	3984019	ram_anta_gu_2013	-
1676	2	4859379	ram_anta_gu_2013	-
1666	5	15766269	ram_anta_gu_2013	PTEN1
1674	1	20046434	ram_anta_pu_2013	-
1695	1	22263209	ram_anta_pu_2013	AT1G60420
1697	2	3984019	ram_anta_pu_2013	-
1676	2	4859379	ram_anta_pu_2013	-
1476	3	16954412	ram_anta_pu_2013	UTR5
1666	5	15766269	ram_anta_pu_2013	PTEN1
1698	5	15827262	ram_anta_pu_2013	AT5G39530
1674	1	20046434	ram_anta_pu_2013	-
1695	1	22263209	ram_anta_pu_2013	AT1G60420
1697	2	3984019	ram_anta_pu_2013	-
1676	2	4859379	ram_anta_pu_2013	-
1478	3	16954881	ram_anta_pu_2013	UTR5
1479	3	16955150	ram_anta_pu_2013	UTR5
1666	5	15766269	ram_anta_pu_2013	PTEN1
1698	5	15827262	ram_anta_pu_2013	AT5G39530
1699	1	17275479	ram_mutu_con_2013	AT1G46984
1700	1	21939556	ram_mutu_con_2013	AT1G59710
1695	1	22263209	ram_mutu_con_2013	AT1G60420
1701	2	8285150	ram_mutu_con_2013	HMA4
1702	2	8287529	ram_mutu_con_2013	AT2G19120
1703	2	10447687	ram_mutu_con_2013	-
1704	3	23101717	ram_mutu_con_2013	AT3G62455
1705	4	13980674	ram_mutu_con_2013	AT4G28162
1700	1	21939556	ram_mutu_cu_2013	AT1G59710
1695	1	22263209	ram_mutu_cu_2013	AT1G60420
1702	2	8287529	ram_mutu_cu_2013	AT2G19120
1703	2	10447687	ram_mutu_cu_2013	-
1704	3	23101717	ram_mutu_cu_2013	AT3G62455
1699	1	17275479	ram_mutu_eu_2013	AT1G46984
1700	1	21939556	ram_mutu_eu_2013	AT1G59710
1695	1	22263209	ram_mutu_eu_2013	AT1G60420
1701	2	8285150	ram_mutu_eu_2013	HMA4
1702	2	8287529	ram_mutu_eu_2013	AT2G19120
1703	2	10447687	ram_mutu_eu_2013	-
1704	3	23101717	ram_mutu_eu_2013	AT3G62455
1699	1	17275479	ram_mutu_gu_2013	AT1G46984
1700	1	21939556	ram_mutu_gu_2013	AT1G59710
1695	1	22263209	ram_mutu_gu_2013	AT1G60420
1701	2	8285150	ram_mutu_gu_2013	HMA4
1702	2	8287529	ram_mutu_gu_2013	AT2G19120
1703	2	10447687	ram_mutu_gu_2013	-
1705	4	13980674	ram_mutu_gu_2013	AT4G28162
1700	1	21939556	ram_mutu_pu_2013	AT1G59710
1695	1	22263209	ram_mutu_pu_2013	AT1G60420
1701	2	8285150	ram_mutu_pu_2013	HMA4
1702	2	8287529	ram_mutu_pu_2013	AT2G19120
1705	4	13980674	ram_mutu_pu_2013	AT4G28162

## Sheet: NA_2012
Supplemental Table 6 The list of significant SNPs in NA in 2012
NUM	CHR	Position	ENV	gene_name
821	1	1222652	ada_agg_con_2012	AT1G04500
822	1	7593633	ada_agg_con_2012	SECA2
823	1	9796319	ada_agg_con_2012	AT1G28090
824	1	13914533	ada_agg_con_2012	AT1G36750
825	1	16115746	ada_agg_con_2012	AT1G09475
826	1	21362940	ada_agg_con_2012	Cand1
827	1	26737686	ada_agg_con_2012	HB18
828	1	26737296	ada_agg_con_2012	HB18
829	3	11780431	ada_agg_con_2012	-
830	3	12429011	ada_agg_con_2012	AT3G30763
831	4	1060797	ada_agg_con_2012	AT4G02410
832	4	1059955	ada_agg_con_2012	AT4G02410
833	4	1060443	ada_agg_con_2012	AT4G02410
834	4	1060464	ada_agg_con_2012	AT4G02410
835	4	1060632	ada_agg_con_2012	AT4G02410
836	4	3139592	ada_agg_con_2012	AT4G06497
837	4	3330896	ada_agg_con_2012	-
838	4	3334607	ada_agg_con_2012	-
839	4	3778113	ada_agg_con_2012	AT4G06636
840	4	3800106	ada_agg_con_2012	AT4G06644
841	4	3806847	ada_agg_con_2012	-
842	4	3860666	ada_agg_con_2012	-
843	4	5527192	ada_agg_con_2012	-
844	4	5954032	ada_agg_con_2012	AT4G09400
845	4	6783275	ada_agg_con_2012	RDR2
846	4	8916015	ada_agg_con_2012	-
847	4	9413067	ada_agg_con_2012	AT4G16745
848	4	12049084	ada_agg_con_2012	AT4G22990
849	4	12049360	ada_agg_con_2012	AT4G22990
850	4	12050143	ada_agg_con_2012	AT4G22990
851	4	12049843	ada_agg_con_2012	AT4G22990
852	4	12050436	ada_agg_con_2012	AT4G22990
853	4	12051111	ada_agg_con_2012	AT4G22990
854	4	12063789	ada_agg_con_2012	-
855	5	5146867	ada_agg_con_2012	-
856	5	26857253	ada_agg_con_2012	HOS15
857	1	7602632	ada_agg_con_2012	SECA2
858	1	26738677	ada_agg_con_2012	HB18
859	1	26739730	ada_agg_con_2012	-
860	1	26742043	ada_agg_con_2012	-
861	1	26742121	ada_agg_con_2012	-
862	4	1061502	ada_agg_con_2012	AT4G02410
863	4	1061584	ada_agg_con_2012	AT4G02410
864	4	1061607	ada_agg_con_2012	AT4G02410
865	4	1061722	ada_agg_con_2012	AT4G02410
866	4	3781397	ada_agg_con_2012	-
867	4	12052675	ada_agg_con_2012	-
868	4	12052868	ada_agg_con_2012	-
869	1	1032189	ada_agg_cu_2012	PSAT1
870	1	2026783	ada_agg_cu_2012	AT1G06620
871	1	2465652	ada_agg_cu_2012	-
872	1	2515968	ada_agg_cu_2012	OTP82
873	1	2951283	ada_agg_cu_2012	-
874	1	3061727	ada_agg_cu_2012	AT1G09483
875	1	3065073	ada_agg_cu_2012	AT1G09490
876	1	3132352	ada_agg_cu_2012	-
877	1	3132582	ada_agg_cu_2012	-
878	1	3133310	ada_agg_cu_2012	AT1G09665
396	1	3170773	ada_agg_cu_2012	COBL6
879	1	3478822	ada_agg_cu_2012	-
880	1	3562461	ada_agg_cu_2012	AT1G10717
881	1	6766446	ada_agg_cu_2012	AT1G19540
882	1	8581271	ada_agg_cu_2012	AT1G24220
883	1	8629027	ada_agg_cu_2012	AT1G24320
884	1	11019430	ada_agg_cu_2012	-
885	1	13591904	ada_agg_cu_2012	-
886	1	13668396	ada_agg_cu_2012	-
887	1	16832623	ada_agg_cu_2012	hemb2
888	1	24212491	ada_agg_cu_2012	AT1G65180
889	1	24260894	ada_agg_cu_2012	CBSX6
890	1	26887619	ada_agg_cu_2012	GDPD4
891	1	27880733	ada_agg_cu_2012	AT1G74150
892	1	27888336	ada_agg_cu_2012	TRM4
893	1	27938277	ada_agg_cu_2012	HSP101
894	1	28152805	ada_agg_cu_2012	FAB1
895	1	28571140	ada_agg_cu_2012	AT1G76140
896	1	28575896	ada_agg_cu_2012	ECH2
897	1	28577239	ada_agg_cu_2012	ECH2
898	1	29921310	ada_agg_cu_2012	AT1G79540
899	1	30182894	ada_agg_cu_2012	PPR596
900	1	30183986	ada_agg_cu_2012	AT1G80280
901	1	30200878	ada_agg_cu_2012	GA3OX2
902	1	30216388	ada_agg_cu_2012	CYCA2;4
903	2	802887	ada_agg_cu_2012	UTR1
904	2	1030024	ada_agg_cu_2012	AT2G03380
905	2	1183373	ada_agg_cu_2012	REME1
134	2	2721771	ada_agg_cu_2012	AT2G06810
906	2	3940051	ada_agg_cu_2012	AT2G10260
907	2	4013898	ada_agg_cu_2012	AT2G10440
908	2	4016397	ada_agg_cu_2012	AT2G10440
909	2	6360593	ada_agg_cu_2012	NPY2
910	2	8482343	ada_agg_cu_2012	KEA4
911	2	13369796	ada_agg_cu_2012	GLX2-5
912	2	13960191	ada_agg_cu_2012	AT2G32910
913	2	14016677	ada_agg_cu_2012	-
914	2	14117004	ada_agg_cu_2012	-
915	2	14473322	ada_agg_cu_2012	AT2G34290
916	2	14485811	ada_agg_cu_2012	AT2G34320
917	2	14492019	ada_agg_cu_2012	-
918	2	14510601	ada_agg_cu_2012	AT2G34370
919	2	17205051	ada_agg_cu_2012	-
920	2	17255338	ada_agg_cu_2012	-
921	2	18222228	ada_agg_cu_2012	AT2G44040
922	2	18242546	ada_agg_cu_2012	GDI1
923	2	18247841	ada_agg_cu_2012	MLO15
924	2	18251751	ada_agg_cu_2012	-
925	2	18253784	ada_agg_cu_2012	AT2G44140
926	2	18254473	ada_agg_cu_2012	AT2G44140
927	2	18254562	ada_agg_cu_2012	AT2G44140
928	2	18255914	ada_agg_cu_2012	AT2G44140
929	3	1641554	ada_agg_cu_2012	AT3G05640
930	3	1657697	ada_agg_cu_2012	-
931	3	1687265	ada_agg_cu_2012	SYP43
932	3	1697983	ada_agg_cu_2012	-
933	3	1707991	ada_agg_cu_2012	AT3G05760
934	3	1724978	ada_agg_cu_2012	LON4
935	3	1730642	ada_agg_cu_2012	-
936	3	1730937	ada_agg_cu_2012	-
937	3	1743792	ada_agg_cu_2012	MUG7
938	3	2101643	ada_agg_cu_2012	-
939	3	3606617	ada_agg_cu_2012	AT3G11450
940	3	8001712	ada_agg_cu_2012	-
941	3	10271836	ada_agg_cu_2012	-
942	3	11618643	ada_agg_cu_2012	AT3G29771
943	3	11771833	ada_agg_cu_2012	AT3G30145
944	3	14428654	ada_agg_cu_2012	AT3G42256
945	3	14573613	ada_agg_cu_2012	-
946	3	14743478	ada_agg_cu_2012	AT3G42653
947	3	14974616	ada_agg_cu_2012	AT3G42910
948	3	15206205	ada_agg_cu_2012	-
949	3	17895650	ada_agg_cu_2012	-
950	3	17968828	ada_agg_cu_2012	-
951	3	20645170	ada_agg_cu_2012	AT3G55646
952	3	20665136	ada_agg_cu_2012	-
953	4	378668	ada_agg_cu_2012	AT4G03765
954	4	1781332	ada_agg_cu_2012	-
955	4	2637373	ada_agg_cu_2012	ENT4
956	4	2650860	ada_agg_cu_2012	-
957	4	2652162	ada_agg_cu_2012	AT4G05140
958	4	4845944	ada_agg_cu_2012	-
959	4	4846418	ada_agg_cu_2012	-
960	4	5624789	ada_agg_cu_2012	AT4G08830
961	4	6436976	ada_agg_cu_2012	-
962	4	6445357	ada_agg_cu_2012	-
963	4	6453138	ada_agg_cu_2012	AT4G10420
964	4	7972514	ada_agg_cu_2012	AT4G13730
965	4	8234981	ada_agg_cu_2012	-
966	4	9000143	ada_agg_cu_2012	AT4G15840
967	4	9002808	ada_agg_cu_2012	RH1
968	4	9682091	ada_agg_cu_2012	NS1
969	4	10370433	ada_agg_cu_2012	AT4G18930
970	4	17163230	ada_agg_cu_2012	AT4G36270
971	4	17298844	ada_agg_cu_2012	AT4G36700
972	4	17319172	ada_agg_cu_2012	-
973	4	18069825	ada_agg_cu_2012	AT4G38670
974	4	18075639	ada_agg_cu_2012	AT4G38690
975	4	18255824	ada_agg_cu_2012	-
976	4	18259338	ada_agg_cu_2012	-
479	4	18259395	ada_agg_cu_2012	-
480	4	18259491	ada_agg_cu_2012	-
478	4	18259859	ada_agg_cu_2012	APL3
977	4	18260567	ada_agg_cu_2012	APL3
978	4	18261665	ada_agg_cu_2012	APL3
979	5	517725	ada_agg_cu_2012	ALG10
980	5	3154125	ada_agg_cu_2012	TPR13
981	5	4414615	ada_agg_cu_2012	ABO1
982	5	4422050	ada_agg_cu_2012	PAO1
983	5	4891189	ada_agg_cu_2012	VDAC3
984	5	5229936	ada_agg_cu_2012	GEX3
985	5	6645414	ada_agg_cu_2012	S1P
986	5	6650189	ada_agg_cu_2012	AT5G19680
987	5	6664058	ada_agg_cu_2012	AT5G00420
988	5	6798740	ada_agg_cu_2012	AT5G20130
989	5	7192857	ada_agg_cu_2012	AGO9
990	5	7245056	ada_agg_cu_2012	PAA2
991	5	9191738	ada_agg_cu_2012	CLC-D
992	5	9202449	ada_agg_cu_2012	AT5G26260
993	5	9227833	ada_agg_cu_2012	AT5G26290
994	5	9313008	ada_agg_cu_2012	AT5G26680
995	5	11417117	ada_agg_cu_2012	-
996	5	13348855	ada_agg_cu_2012	AT5G35076
997	5	16405616	ada_agg_cu_2012	TOM20-4
998	5	17593158	ada_agg_cu_2012	AT5G43790
999	5	18091244	ada_agg_cu_2012	CHR4
1000	5	18371106	ada_agg_cu_2012	-
1001	5	20689943	ada_agg_cu_2012	MAB1
1002	5	20862968	ada_agg_cu_2012	AT5G51340
1003	5	21041690	ada_agg_cu_2012	-
1004	5	21160528	ada_agg_cu_2012	-
1005	5	21325637	ada_agg_cu_2012	-
1006	5	21380524	ada_agg_cu_2012	AT5G52730
1007	5	22408894	ada_agg_cu_2012	IAMT1
1008	5	24061305	ada_agg_cu_2012	VIP2
1009	5	24456347	ada_agg_cu_2012	-
1010	5	24928057	ada_agg_cu_2012	AT5G62060
1011	5	24952368	ada_agg_cu_2012	AT5G62130
1012	1	27883805	ada_agg_cu_2012	AT1G74150
1013	1	28573101	ada_agg_cu_2012	AT1G76140
1014	2	18228351	ada_agg_cu_2012	-
1015	2	18245514	ada_agg_cu_2012	MLO15
1016	2	18257717	ada_agg_cu_2012	AT2G44140
1017	3	1688418	ada_agg_cu_2012	IMPA-7
1018	3	1735072	ada_agg_cu_2012	INVH
1019	3	1735627	ada_agg_cu_2012	INVH
1020	4	6439425	ada_agg_cu_2012	-
513	4	18259891	ada_agg_cu_2012	APL3
1021	5	6654427	ada_agg_cu_2012	STT3A
1022	5	9316356	ada_agg_cu_2012	-
1023	5	21329028	ada_agg_cu_2012	AT5G52550
1024	5	24061593	ada_agg_cu_2012	VIP2
911	2	13369796	ada_agg_eu_2012	GLX2-5
942	3	11618643	ada_agg_eu_2012	AT3G29771
944	3	14428654	ada_agg_eu_2012	AT3G42256
841	4	3806847	ada_agg_eu_2012	-
963	4	6453138	ada_agg_eu_2012	AT4G10420
964	4	7972514	ada_agg_eu_2012	AT4G13730
1025	5	6881559	ada_agg_eu_2012	Phox3
1026	5	6881818	ada_agg_eu_2012	Phox3
641	1	24129689	ada_agg_gu_2012	-
1027	1	26591901	ada_agg_gu_2012	-
943	3	11771833	ada_agg_gu_2012	AT3G30145
944	3	14428654	ada_agg_gu_2012	AT3G42256
1028	3	14442077	ada_agg_gu_2012	AT3G42270
946	3	14743478	ada_agg_gu_2012	AT3G42653
959	4	4846418	ada_agg_gu_2012	-
844	4	5954032	ada_agg_gu_2012	AT4G09400
871	1	2465652	ada_agg_pu_2012	-
872	1	2515968	ada_agg_pu_2012	OTP82
883	1	8629027	ada_agg_pu_2012	AT1G24320
890	1	26887619	ada_agg_pu_2012	GDPD4
893	1	27938277	ada_agg_pu_2012	HSP101
895	1	28571140	ada_agg_pu_2012	AT1G76140
906	2	3940051	ada_agg_pu_2012	AT2G10260
911	2	13369796	ada_agg_pu_2012	GLX2-5
933	3	1707991	ada_agg_pu_2012	AT3G05760
934	3	1724978	ada_agg_pu_2012	LON4
935	3	1730642	ada_agg_pu_2012	-
937	3	1743792	ada_agg_pu_2012	MUG7
938	3	2101643	ada_agg_pu_2012	-
943	3	11771833	ada_agg_pu_2012	AT3G30145
944	3	14428654	ada_agg_pu_2012	AT3G42256
1028	3	14442077	ada_agg_pu_2012	AT3G42270
1029	3	14506061	ada_agg_pu_2012	AT3G42383
950	3	17968828	ada_agg_pu_2012	-
962	4	6445357	ada_agg_pu_2012	-
963	4	6453138	ada_agg_pu_2012	AT4G10420
964	4	7972514	ada_agg_pu_2012	AT4G13730
967	4	9002808	ada_agg_pu_2012	RH1
968	4	9682091	ada_agg_pu_2012	NS1
979	5	517725	ada_agg_pu_2012	ALG10
1030	5	12550436	ada_agg_pu_2012	AT5G33280
1031	5	13245367	ada_agg_pu_2012	AT5G34950
1032	5	17087738	ada_agg_pu_2012	-
1006	5	21380524	ada_agg_pu_2012	AT5G52730
1013	1	28573101	ada_agg_pu_2012	AT1G76140
1018	3	1735072	ada_agg_pu_2012	INVH
1033	1	23922786	ada_alt_con_2012	-
1034	5	8402672	ada_alt_con_2012	PP2-B12
1035	5	8403006	ada_alt_con_2012	PP2-B12
1036	1	1612634	ada_alt_cu_2012	-
870	1	2026783	ada_alt_cu_2012	AT1G06620
871	1	2465652	ada_alt_cu_2012	-
1037	1	2471506	ada_alt_cu_2012	AT1G07970
872	1	2515968	ada_alt_cu_2012	OTP82
1038	1	2516044	ada_alt_cu_2012	OTP82
873	1	2951283	ada_alt_cu_2012	-
874	1	3061727	ada_alt_cu_2012	AT1G09483
875	1	3065073	ada_alt_cu_2012	AT1G09490
1039	1	3131332	ada_alt_cu_2012	-
876	1	3132352	ada_alt_cu_2012	-
877	1	3132582	ada_alt_cu_2012	-
878	1	3133310	ada_alt_cu_2012	AT1G09665
1040	1	3169068	ada_alt_cu_2012	COBL6
396	1	3170773	ada_alt_cu_2012	COBL6
879	1	3478822	ada_alt_cu_2012	-
880	1	3562461	ada_alt_cu_2012	AT1G10717
881	1	6766446	ada_alt_cu_2012	AT1G19540
882	1	8581271	ada_alt_cu_2012	AT1G24220
883	1	8629027	ada_alt_cu_2012	AT1G24320
1041	1	10606396	ada_alt_cu_2012	AT1G30160
884	1	11019430	ada_alt_cu_2012	-
1042	1	13505144	ada_alt_cu_2012	AT1G36110
885	1	13591904	ada_alt_cu_2012	-
886	1	13668396	ada_alt_cu_2012	-
1043	1	16177219	ada_alt_cu_2012	AT1G43030
1044	1	16180895	ada_alt_cu_2012	AT1G43030
887	1	16832623	ada_alt_cu_2012	hemb2
1045	1	19947278	ada_alt_cu_2012	AT1G53440
1046	1	21359867	ada_alt_cu_2012	AT1G57670
1047	1	22584530	ada_alt_cu_2012	AT1G61240
888	1	24212491	ada_alt_cu_2012	AT1G65180
889	1	24260894	ada_alt_cu_2012	CBSX6
1048	1	24284075	ada_alt_cu_2012	AT1G65365
890	1	26887619	ada_alt_cu_2012	GDPD4
891	1	27880733	ada_alt_cu_2012	AT1G74150
892	1	27888336	ada_alt_cu_2012	TRM4
893	1	27938277	ada_alt_cu_2012	HSP101
894	1	28152805	ada_alt_cu_2012	FAB1
895	1	28571140	ada_alt_cu_2012	AT1G76140
896	1	28575896	ada_alt_cu_2012	ECH2
897	1	28577239	ada_alt_cu_2012	ECH2
898	1	29921310	ada_alt_cu_2012	AT1G79540
1049	1	30083388	ada_alt_cu_2012	AT1G79970
1050	1	30085859	ada_alt_cu_2012	AT1G79990
1051	1	30105021	ada_alt_cu_2012	AT1G80030
1052	1	30136755	ada_alt_cu_2012	PP2-B11
1053	1	30137253	ada_alt_cu_2012	-
899	1	30182894	ada_alt_cu_2012	PPR596
900	1	30183986	ada_alt_cu_2012	AT1G80280
901	1	30200878	ada_alt_cu_2012	GA3OX2
1054	1	30212057	ada_alt_cu_2012	-
902	1	30216388	ada_alt_cu_2012	CYCA2;4
903	2	802887	ada_alt_cu_2012	UTR1
904	2	1030024	ada_alt_cu_2012	AT2G03380
905	2	1183373	ada_alt_cu_2012	REME1
133	2	2693276	ada_alt_cu_2012	AT2G06760
134	2	2721771	ada_alt_cu_2012	AT2G06810
136	2	2807589	ada_alt_cu_2012	AT2G06906
1055	2	2846087	ada_alt_cu_2012	AT2G06930
137	2	2884593	ada_alt_cu_2012	AT2G06980
906	2	3940051	ada_alt_cu_2012	AT2G10260
1056	2	3942040	ada_alt_cu_2012	AT2G10265
907	2	4013898	ada_alt_cu_2012	AT2G10440
908	2	4016397	ada_alt_cu_2012	AT2G10440
1057	2	4317167	ada_alt_cu_2012	AT2G10950
909	2	6360593	ada_alt_cu_2012	NPY2
1058	2	6863262	ada_alt_cu_2012	AT2G15750
910	2	8482343	ada_alt_cu_2012	KEA4
911	2	13369796	ada_alt_cu_2012	GLX2-5
1059	2	13920382	ada_alt_cu_2012	BGAL9
912	2	13960191	ada_alt_cu_2012	AT2G32910
538	2	14071762	ada_alt_cu_2012	AT2G33205
914	2	14117004	ada_alt_cu_2012	-
916	2	14485811	ada_alt_cu_2012	AT2G34320
919	2	17205051	ada_alt_cu_2012	-
920	2	17255338	ada_alt_cu_2012	-
921	2	18222228	ada_alt_cu_2012	AT2G44040
922	2	18242546	ada_alt_cu_2012	GDI1
924	2	18251751	ada_alt_cu_2012	-
925	2	18253784	ada_alt_cu_2012	AT2G44140
927	2	18254562	ada_alt_cu_2012	AT2G44140
926	2	18254473	ada_alt_cu_2012	AT2G44140
928	2	18255914	ada_alt_cu_2012	AT2G44140
929	3	1641554	ada_alt_cu_2012	AT3G05640
930	3	1657697	ada_alt_cu_2012	-
931	3	1687265	ada_alt_cu_2012	SYP43
932	3	1697983	ada_alt_cu_2012	-
933	3	1707991	ada_alt_cu_2012	AT3G05760
934	3	1724978	ada_alt_cu_2012	LON4
935	3	1730642	ada_alt_cu_2012	-
936	3	1730937	ada_alt_cu_2012	-
937	3	1743792	ada_alt_cu_2012	MUG7
938	3	2101643	ada_alt_cu_2012	-
939	3	3606617	ada_alt_cu_2012	AT3G11450
1060	3	4807339	ada_alt_cu_2012	AT3G14390
940	3	8001712	ada_alt_cu_2012	-
1061	3	8565423	ada_alt_cu_2012	-
941	3	10271836	ada_alt_cu_2012	-
942	3	11618643	ada_alt_cu_2012	AT3G29771
943	3	11771833	ada_alt_cu_2012	AT3G30145
944	3	14428654	ada_alt_cu_2012	AT3G42256
945	3	14573613	ada_alt_cu_2012	-
946	3	14743478	ada_alt_cu_2012	AT3G42653
947	3	14974616	ada_alt_cu_2012	AT3G42910
948	3	15206205	ada_alt_cu_2012	-
949	3	17895650	ada_alt_cu_2012	-
950	3	17968828	ada_alt_cu_2012	-
1062	3	19808347	ada_alt_cu_2012	-
1063	3	20430634	ada_alt_cu_2012	TT5
1064	3	20439504	ada_alt_cu_2012	AT3G55140
1065	3	20490130	ada_alt_cu_2012	HEXO1
951	3	20645170	ada_alt_cu_2012	AT3G55646
952	3	20665136	ada_alt_cu_2012	-
1066	4	358595	ada_alt_cu_2012	GIF3
953	4	378668	ada_alt_cu_2012	AT4G03765
954	4	1781332	ada_alt_cu_2012	-
1067	4	2507692	ada_alt_cu_2012	AT4G02845
955	4	2637373	ada_alt_cu_2012	ENT4
956	4	2650860	ada_alt_cu_2012	-
957	4	2652162	ada_alt_cu_2012	AT4G05140
1068	4	3165363	ada_alt_cu_2012	-
958	4	4845944	ada_alt_cu_2012	-
960	4	5624789	ada_alt_cu_2012	AT4G08830
961	4	6436976	ada_alt_cu_2012	-
962	4	6445357	ada_alt_cu_2012	-
963	4	6453138	ada_alt_cu_2012	AT4G10420
964	4	7972514	ada_alt_cu_2012	AT4G13730
965	4	8234981	ada_alt_cu_2012	-
1069	4	8375408	ada_alt_cu_2012	emb2739
966	4	9000143	ada_alt_cu_2012	AT4G15840
967	4	9002808	ada_alt_cu_2012	RH1
968	4	9682091	ada_alt_cu_2012	NS1
969	4	10370433	ada_alt_cu_2012	AT4G18930
1070	4	17080785	ada_alt_cu_2012	AT4G36090
970	4	17163230	ada_alt_cu_2012	AT4G36270
971	4	17298844	ada_alt_cu_2012	AT4G36700
1071	4	17300143	ada_alt_cu_2012	AT4G36700
972	4	17319172	ada_alt_cu_2012	-
973	4	18069825	ada_alt_cu_2012	AT4G38670
974	4	18075639	ada_alt_cu_2012	AT4G38690
975	4	18255824	ada_alt_cu_2012	-
976	4	18259338	ada_alt_cu_2012	-
479	4	18259395	ada_alt_cu_2012	-
480	4	18259491	ada_alt_cu_2012	-
478	4	18259859	ada_alt_cu_2012	APL3
977	4	18260567	ada_alt_cu_2012	APL3
978	4	18261665	ada_alt_cu_2012	APL3
1072	4	18262110	ada_alt_cu_2012	APL3
979	5	517725	ada_alt_cu_2012	ALG10
980	5	3154125	ada_alt_cu_2012	TPR13
981	5	4414615	ada_alt_cu_2012	ABO1
982	5	4422050	ada_alt_cu_2012	PAO1
1073	5	4862402	ada_alt_cu_2012	SNL2
1074	5	4887327	ada_alt_cu_2012	AT5G15080
983	5	4891189	ada_alt_cu_2012	VDAC3
984	5	5229936	ada_alt_cu_2012	GEX3
985	5	6645414	ada_alt_cu_2012	S1P
986	5	6650189	ada_alt_cu_2012	AT5G19680
987	5	6664058	ada_alt_cu_2012	AT5G00420
988	5	6798740	ada_alt_cu_2012	AT5G20130
989	5	7192857	ada_alt_cu_2012	AGO9
991	5	9191738	ada_alt_cu_2012	CLC-D
992	5	9202449	ada_alt_cu_2012	AT5G26260
993	5	9227833	ada_alt_cu_2012	AT5G26290
995	5	11417117	ada_alt_cu_2012	-
1031	5	13245367	ada_alt_cu_2012	AT5G34950
996	5	13348855	ada_alt_cu_2012	AT5G35076
997	5	16405616	ada_alt_cu_2012	TOM20-4
998	5	17593158	ada_alt_cu_2012	AT5G43790
1075	5	17993240	ada_alt_cu_2012	-
999	5	18091244	ada_alt_cu_2012	CHR4
1000	5	18371106	ada_alt_cu_2012	-
1076	5	18675308	ada_alt_cu_2012	PTR3
1077	5	19954219	ada_alt_cu_2012	AT5G49215
1078	5	20288265	ada_alt_cu_2012	CLC-C
1001	5	20689943	ada_alt_cu_2012	MAB1
1003	5	21041690	ada_alt_cu_2012	-
1004	5	21160528	ada_alt_cu_2012	-
1005	5	21325637	ada_alt_cu_2012	-
1006	5	21380524	ada_alt_cu_2012	AT5G52730
1007	5	22408894	ada_alt_cu_2012	IAMT1
1008	5	24061305	ada_alt_cu_2012	VIP2
1009	5	24456347	ada_alt_cu_2012	-
1010	5	24928057	ada_alt_cu_2012	AT5G62060
1011	5	24952368	ada_alt_cu_2012	AT5G62130
1012	1	27883805	ada_alt_cu_2012	AT1G74150
1013	1	28573101	ada_alt_cu_2012	AT1G76140
1079	1	30140048	ada_alt_cu_2012	AT1G80120
1014	2	18228351	ada_alt_cu_2012	-
1015	2	18245514	ada_alt_cu_2012	MLO15
1016	2	18257717	ada_alt_cu_2012	AT2G44140
1017	3	1688418	ada_alt_cu_2012	IMPA-7
1018	3	1735072	ada_alt_cu_2012	INVH
1019	3	1735627	ada_alt_cu_2012	INVH
1080	3	19814515	ada_alt_cu_2012	LOG4
1020	4	6439425	ada_alt_cu_2012	-
513	4	18259891	ada_alt_cu_2012	APL3
1021	5	6654427	ada_alt_cu_2012	STT3A
1023	5	21329028	ada_alt_cu_2012	AT5G52550
1024	5	24061593	ada_alt_cu_2012	VIP2
1081	1	9836055	ada_alt_eu_2012	AT1G28150
1082	1	16232957	ada_alt_eu_2012	AT1G43140
1083	3	665250	ada_alt_eu_2012	THO7
1084	3	726008	ada_alt_eu_2012	AT3G03140
1085	3	742709	ada_alt_eu_2012	EXPA13
1086	3	10664162	ada_alt_eu_2012	-
1087	3	11027190	ada_alt_eu_2012	-
1088	4	4716973	ada_alt_eu_2012	AT4G07915
1089	5	25361555	ada_alt_eu_2012	-
1090	1	9836139	ada_alt_eu_2012	AT1G28150
1091	3	667782	ada_alt_eu_2012	AT3G02960
1092	3	731743	ada_alt_eu_2012	-
919	2	17205051	ada_alt_gu_2012	-
1093	4	11585823	ada_alt_gu_2012	-
871	1	2465652	ada_alt_pu_2012	-
890	1	26887619	ada_alt_pu_2012	GDPD4
895	1	28571140	ada_alt_pu_2012	AT1G76140
906	2	3940051	ada_alt_pu_2012	AT2G10260
911	2	13369796	ada_alt_pu_2012	GLX2-5
933	3	1707991	ada_alt_pu_2012	AT3G05760
934	3	1724978	ada_alt_pu_2012	LON4
935	3	1730642	ada_alt_pu_2012	-
937	3	1743792	ada_alt_pu_2012	MUG7
938	3	2101643	ada_alt_pu_2012	-
942	3	11618643	ada_alt_pu_2012	AT3G29771
943	3	11771833	ada_alt_pu_2012	AT3G30145
944	3	14428654	ada_alt_pu_2012	AT3G42256
1028	3	14442077	ada_alt_pu_2012	AT3G42270
962	4	6445357	ada_alt_pu_2012	-
963	4	6453138	ada_alt_pu_2012	AT4G10420
964	4	7972514	ada_alt_pu_2012	AT4G13730
967	4	9002808	ada_alt_pu_2012	RH1
968	4	9682091	ada_alt_pu_2012	NS1
979	5	517725	ada_alt_pu_2012	ALG10
1030	5	12550436	ada_alt_pu_2012	AT5G33280
1032	5	17087738	ada_alt_pu_2012	-
1006	5	21380524	ada_alt_pu_2012	AT5G52730
1013	1	28573101	ada_alt_pu_2012	AT1G76140
1018	3	1735072	ada_alt_pu_2012	INVH
1094	1	8170970	ada_anta_con_2012	MDP40
1095	1	8858371	ada_anta_con_2012	UMAMIT24
1096	2	18401773	ada_anta_con_2012	AT2G44580
1097	3	6166014	ada_anta_con_2012	AT3G18020
1098	3	6168666	ada_anta_con_2012	HAL3A
1099	3	11841141	ada_anta_con_2012	-
1100	3	15069256	ada_anta_con_2012	AT3G43070
1101	3	23379923	ada_anta_con_2012	NEK4
1102	4	2058312	ada_anta_con_2012	AT4G04265
1103	4	2251145	ada_anta_con_2012	AT4G04525
1104	4	4913849	ada_anta_con_2012	AT4G08053
1105	4	7317637	ada_anta_con_2012	CYP706A7
1106	5	18525098	ada_anta_con_2012	AT5G45660
1107	5	18524995	ada_anta_con_2012	AT5G45660
1108	3	6166850	ada_anta_con_2012	AT3G18020
1109	3	6167151	ada_anta_con_2012	AT3G18020
1110	3	6167471	ada_anta_con_2012	AT3G18020
1111	3	6168899	ada_anta_con_2012	HAL3A
1112	5	18525111	ada_anta_con_2012	AT5G45660
1094	1	8170970	ada_anta_bu_2012	MDP40
1095	1	8858371	ada_anta_bu_2012	UMAMIT24
1096	2	18401773	ada_anta_bu_2012	AT2G44580
1097	3	6166014	ada_anta_bu_2012	AT3G18020
1098	3	6168666	ada_anta_bu_2012	HAL3A
1099	3	11841141	ada_anta_bu_2012	-
1113	3	12162010	ada_anta_bu_2012	AT3G30570
1100	3	15069256	ada_anta_bu_2012	AT3G43070
1101	3	23379923	ada_anta_bu_2012	NEK4
1103	4	2251145	ada_anta_bu_2012	AT4G04525
1104	4	4913849	ada_anta_bu_2012	AT4G08053
1105	4	7317637	ada_anta_bu_2012	CYP706A7
1106	5	18525098	ada_anta_bu_2012	AT5G45660
1107	5	18524995	ada_anta_bu_2012	AT5G45660
1108	3	6166850	ada_anta_bu_2012	AT3G18020
1109	3	6167151	ada_anta_bu_2012	AT3G18020
1110	3	6167471	ada_anta_bu_2012	AT3G18020
1111	3	6168899	ada_anta_bu_2012	HAL3A
1112	5	18525111	ada_anta_bu_2012	AT5G45660
1114	3	7460607	ada_anta_pu_2012	ABCC8
1115	5	20787773	ada_anta_pu_2012	-
1116	1	3800859	ada_mutu_con_2012	AT1G11303
1117	1	4424316	ada_mutu_con_2012	PIRL3
1118	1	10792315	ada_mutu_con_2012	DRT111
1119	1	10798024	ada_mutu_con_2012	PHV
1120	1	17455807	ada_mutu_con_2012	AT1G47540
1121	1	17894989	ada_mutu_con_2012	-
1122	1	17895552	ada_mutu_con_2012	-
1123	1	28681190	ada_mutu_con_2012	PHT1;9
1124	1	29907293	ada_mutu_con_2012	AT1G09863
1125	2	9375810	ada_mutu_con_2012	LST8-2
1126	2	14847734	ada_mutu_con_2012	AT2G35250
1127	3	904421	ada_mutu_con_2012	-
1128	3	10794519	ada_mutu_con_2012	AT3G28760
1129	3	14431510	ada_mutu_con_2012	AT3G42256
1130	3	15512068	ada_mutu_con_2012	AT3G43590
1131	3	15514017	ada_mutu_con_2012	AAO2
1132	3	21072319	ada_mutu_con_2012	AT3G56920
1133	4	14128765	ada_mutu_con_2012	-
1134	4	14141533	ada_mutu_con_2012	-
1135	5	6256499	ada_mutu_con_2012	AT5G18750
1136	5	7550589	ada_mutu_con_2012	AT5G22720
1137	5	9732589	ada_mutu_con_2012	AT5G27560
1138	5	9727631	ada_mutu_con_2012	AT5G27550
1139	5	9732873	ada_mutu_con_2012	AT5G27560
1140	5	9733672	ada_mutu_con_2012	AT5G27560
1141	5	9756819	ada_mutu_con_2012	-
1142	5	9756089	ada_mutu_con_2012	-
1143	5	9757386	ada_mutu_con_2012	-
1144	5	9758995	ada_mutu_con_2012	-
1145	5	9759532	ada_mutu_con_2012	-
1146	5	9780900	ada_mutu_con_2012	ACBP5
1147	5	9781145	ada_mutu_con_2012	TIF3B1
1148	5	9795804	ada_mutu_con_2012	RECQSIM
1149	5	9815720	ada_mutu_con_2012	emb1644
1150	5	9820020	ada_mutu_con_2012	AT5G27730
1151	5	17298859	ada_mutu_con_2012	AT5G43100
1152	5	21514245	ada_mutu_con_2012	AT5G00655
1153	5	26066214	ada_mutu_con_2012	AT5G65225
1154	5	26063883	ada_mutu_con_2012	AT5G65225
1155	5	26064244	ada_mutu_con_2012	AT5G65225
1156	5	26064835	ada_mutu_con_2012	AT5G65225
1157	5	26065697	ada_mutu_con_2012	AT5G65225
1158	5	26065855	ada_mutu_con_2012	AT5G65225
1159	5	26065961	ada_mutu_con_2012	AT5G65225
1160	5	26065989	ada_mutu_con_2012	AT5G65225
1161	1	10792424	ada_mutu_con_2012	DRT111
1162	3	15515477	ada_mutu_con_2012	AAO2
1163	5	9736229	ada_mutu_con_2012	CDC20.5
1164	5	9760733	ada_mutu_con_2012	AT5G27607
1165	5	9785097	ada_mutu_con_2012	TIF3B1
1166	5	9796322	ada_mutu_con_2012	RECQSIM
1167	5	9822260	ada_mutu_con_2012	AT5G27730
1168	5	26066603	ada_mutu_con_2012	AT5G65225
1169	5	26067592	ada_mutu_con_2012	AT5G65225
1170	5	26068732	ada_mutu_con_2012	MYB53
1171	1	8976620	ada_mutu_cu_2012	AT1G25550
1172	1	11629198	ada_mutu_cu_2012	KAN2
1173	1	22672074	ada_mutu_cu_2012	AT1G61440
1174	2	12171067	ada_mutu_cu_2012	BGAL8
1126	2	14847734	ada_mutu_cu_2012	AT2G35250
1175	3	8886353	ada_mutu_cu_2012	AT3G24460
1176	4	7646350	ada_mutu_cu_2012	AT4G13120
1177	5	1648346	ada_mutu_cu_2012	EMB2771
1178	5	1670774	ada_mutu_cu_2012	-
1179	2	12171313	ada_mutu_cu_2012	BGAL8
1180	5	1652332	ada_mutu_cu_2012	EMB2771
1181	1	10892037	ada_mutu_bu_2012	-
1182	1	10893900	ada_mutu_bu_2012	AT1G30700
1183	1	10949424	ada_mutu_bu_2012	AT1G30820
1184	1	10965274	ada_mutu_bu_2012	-
939	3	3606617	ada_mutu_bu_2012	AT3G11450
1176	4	7646350	ada_mutu_bu_2012	AT4G13120
1127	3	904421	ada_mutu_eu_2012	-
1130	3	15512068	ada_mutu_eu_2012	AT3G43590
1131	3	15514017	ada_mutu_eu_2012	AAO2
1176	4	7646350	ada_mutu_eu_2012	AT4G13120
1134	4	14141533	ada_mutu_eu_2012	-
1141	5	9756819	ada_mutu_eu_2012	-
1148	5	9795804	ada_mutu_eu_2012	RECQSIM
1162	3	15515477	ada_mutu_eu_2012	AAO2
1166	5	9796322	ada_mutu_eu_2012	RECQSIM
1171	1	8976620	ada_mutu_gu_2012	AT1G25550
1185	1	9117947	ada_mutu_gu_2012	SP1L1
1186	1	9121290	ada_mutu_gu_2012	-
1176	4	7646350	ada_mutu_gu_2012	AT4G13120
1187	4	13841040	ada_mutu_gu_2012	AT4G27745
1171	1	8976620	ada_mutu_pu_2012	AT1G25550
1172	1	11629198	ada_mutu_pu_2012	KAN2
1173	1	22672074	ada_mutu_pu_2012	AT1G61440
1174	2	12171067	ada_mutu_pu_2012	BGAL8
1126	2	14847734	ada_mutu_pu_2012	AT2G35250
1175	3	8886353	ada_mutu_pu_2012	AT3G24460
1176	4	7646350	ada_mutu_pu_2012	AT4G13120
1177	5	1648346	ada_mutu_pu_2012	EMB2771
1178	5	1670774	ada_mutu_pu_2012	-
1179	2	12171313	ada_mutu_pu_2012	BGAL8
1180	5	1652332	ada_mutu_pu_2012	EMB2771

## Sheet: NA_2013
Supplemental Table 6 The list of significant SNPs in NA in 2013
NUM	CHR	Position	ENV	gene_name
1706	2	17242200	ada_agg_con_2013	-
1707	5	11302585	ada_agg_con_2013	AT5G29762
1708	1	17336231	ada_agg_cu_2013	3BETAHSD/D1
629	1	20869795	ada_agg_cu_2013	AT1G55830
1709	2	8663344	ada_agg_cu_2013	AT2G20080
1710	2	10697985	ada_agg_cu_2013	CLPB4
1711	2	12998008	ada_agg_cu_2013	-
1712	2	15526272	ada_agg_cu_2013	TKI1
1713	2	15534688	ada_agg_cu_2013	-
1714	2	16045762	ada_agg_cu_2013	AT2G38300
1715	2	16050863	ada_agg_cu_2013	PYL4
1716	2	17387856	ada_agg_cu_2013	ABCA1
1717	2	18290468	ada_agg_cu_2013	AT2G44240
1718	3	5631875	ada_agg_cu_2013	DEG12
1719	3	6705940	ada_agg_cu_2013	MPC
1720	3	6754875	ada_agg_cu_2013	NHD1
1721	3	8793988	ada_agg_cu_2013	AT3G24260
1722	3	9018311	ada_agg_cu_2013	-
1723	3	9019245	ada_agg_cu_2013	-
1724	3	9811426	ada_agg_cu_2013	AT3G26700
1227	3	16612449	ada_agg_cu_2013	SYP72
1725	4	4924076	ada_agg_cu_2013	-
1726	4	4971358	ada_agg_cu_2013	AT4G05315
1727	4	4971806	ada_agg_cu_2013	AT4G05335
1728	4	5923463	ada_agg_cu_2013	NDPK1
1729	4	5927504	ada_agg_cu_2013	AT4G09340
1730	4	5952499	ada_agg_cu_2013	AT4G09390
1731	4	6222884	ada_agg_cu_2013	MES12
1732	4	6515861	ada_agg_cu_2013	-
1733	4	6519182	ada_agg_cu_2013	AT4G10550
1734	4	6820141	ada_agg_cu_2013	AT4G11180
1735	4	13740117	ada_agg_cu_2013	RRP41L
1736	4	13980557	ada_agg_cu_2013	AT4G28162
112	4	17387096	ada_agg_cu_2013	-
1737	5	4573227	ada_agg_cu_2013	MPL1
1738	5	6576354	ada_agg_cu_2013	AT5G19485
1739	5	8448862	ada_agg_cu_2013	EMB2820
1740	5	8614387	ada_agg_cu_2013	-
1741	5	9833447	ada_agg_cu_2013	AT5G04495
1742	5	9973032	ada_agg_cu_2013	-
1743	5	10056421	ada_agg_cu_2013	AT5G04625
1744	5	11403826	ada_agg_cu_2013	-
1745	5	19214331	ada_agg_cu_2013	AT5G47350
1746	5	26103958	ada_agg_cu_2013	HB5
1747	2	8664760	ada_agg_cu_2013	AT2G20080
1748	2	16050894	ada_agg_cu_2013	PYL4
1749	3	9024431	ada_agg_cu_2013	-
1750	4	6516821	ada_agg_cu_2013	AT4G10550
1751	5	9834229	ada_agg_cu_2013	AT5G27765
1752	5	26104528	ada_agg_cu_2013	HB5
1753	1	5487901	ada_agg_eu_2013	AT1G15970
1754	2	16672406	ada_agg_eu_2013	ISA1
1755	2	16726070	ada_agg_eu_2013	-
1706	2	17242200	ada_agg_eu_2013	-
1756	1	5488918	ada_agg_eu_2013	AT1G15970
1757	1	5490544	ada_agg_eu_2013	PnsB1
1758	3	16310681	ada_agg_gu_2013	AT3G44766
1759	1	4584628	ada_agg_pu_2013	AT1G08895
1760	2	8151691	ada_agg_pu_2013	AT2G18820
1709	2	8663344	ada_agg_pu_2013	AT2G20080
1761	2	10571359	ada_agg_pu_2013	AT2G24800
1762	2	15532117	ada_agg_pu_2013	AT2G36980
1713	2	15534688	ada_agg_pu_2013	-
1714	2	16045762	ada_agg_pu_2013	AT2G38300
1715	2	16050863	ada_agg_pu_2013	PYL4
1755	2	16726070	ada_agg_pu_2013	-
1717	2	18290468	ada_agg_pu_2013	AT2G44240
1763	3	5277115	ada_agg_pu_2013	AT3G15590
1764	3	5311412	ada_agg_pu_2013	-
1765	3	5325842	ada_agg_pu_2013	AT3G15720
1766	3	5342097	ada_agg_pu_2013	AT3G15780
1767	3	5341978	ada_agg_pu_2013	AT3G15780
1768	3	5344841	ada_agg_pu_2013	-
1769	3	5364963	ada_agg_pu_2013	WSIP2
1770	3	5381734	ada_agg_pu_2013	AT3G15909
1771	3	5386599	ada_agg_pu_2013	AT3G15920
1772	3	5424359	ada_agg_pu_2013	-
1718	3	5631875	ada_agg_pu_2013	DEG12
1723	3	9019245	ada_agg_pu_2013	-
1722	3	9018311	ada_agg_pu_2013	-
1773	4	2260101	ada_agg_pu_2013	CRK39
1732	4	6515861	ada_agg_pu_2013	-
1774	4	6519109	ada_agg_pu_2013	AT4G10550
1733	4	6519182	ada_agg_pu_2013	AT4G10550
112	4	17387096	ada_agg_pu_2013	-
1737	5	4573227	ada_agg_pu_2013	MPL1
1738	5	6576354	ada_agg_pu_2013	AT5G19485
1739	5	8448862	ada_agg_pu_2013	EMB2820
1740	5	8614387	ada_agg_pu_2013	-
1775	1	4585436	ada_agg_pu_2013	AT1G08895
1747	2	8664760	ada_agg_pu_2013	AT2G20080
1776	2	10571372	ada_agg_pu_2013	AT2G24800
1748	2	16050894	ada_agg_pu_2013	PYL4
1777	3	5346161	ada_agg_pu_2013	AT3G15800
1778	3	5388115	ada_agg_pu_2013	AT3G15920
1749	3	9024431	ada_agg_pu_2013	-
1750	4	6516821	ada_agg_pu_2013	AT4G10550
1779	1	27447040	ada_alt_con_2013	AT1G72960
1780	1	27449873	ada_alt_con_2013	AT1G72960
1781	1	27451582	ada_alt_con_2013	-
1782	1	27457546	ada_alt_con_2013	BGAL17
1783	1	27529363	ada_alt_con_2013	AT1G73210
1784	1	27462078	ada_alt_con_2013	BGAL17
1041	1	10606396	ada_alt_cu_2013	AT1G30160
1709	2	8663344	ada_alt_cu_2013	AT2G20080
1785	2	10571279	ada_alt_cu_2013	AT2G24800
1761	2	10571359	ada_alt_cu_2013	AT2G24800
1710	2	10697985	ada_alt_cu_2013	CLPB4
1714	2	16045762	ada_alt_cu_2013	AT2G38300
1715	2	16050863	ada_alt_cu_2013	PYL4
1717	2	18290468	ada_alt_cu_2013	AT2G44240
1786	2	18301948	ada_alt_cu_2013	AT2G44280
1720	3	6754875	ada_alt_cu_2013	NHD1
1724	3	9811426	ada_alt_cu_2013	AT3G26700
1731	4	6222884	ada_alt_cu_2013	MES12
1738	5	6576354	ada_alt_cu_2013	AT5G19485
1739	5	8448862	ada_alt_cu_2013	EMB2820
1740	5	8614387	ada_alt_cu_2013	-
1787	5	19424196	ada_alt_cu_2013	AT5G47970
1788	5	19424613	ada_alt_cu_2013	AT5G47970
1789	5	19424923	ada_alt_cu_2013	AT5G47970
1790	5	19425091	ada_alt_cu_2013	AT5G47970
1791	5	21671385	ada_alt_cu_2013	-
1747	2	8664760	ada_alt_cu_2013	AT2G20080
1776	2	10571372	ada_alt_cu_2013	AT2G24800
1748	2	16050894	ada_alt_cu_2013	PYL4
1792	5	19425552	ada_alt_cu_2013	AT5G47970
1793	5	8453393	ada_alt_bu_2013	-
1794	5	8461339	ada_alt_bu_2013	AT5G24710
1795	5	8460734	ada_alt_bu_2013	AT5G24710
1796	5	8460835	ada_alt_bu_2013	AT5G24710
1797	5	8465990	ada_alt_bu_2013	AT5G24710
1798	5	8466107	ada_alt_bu_2013	AT5G24710
1799	5	8466286	ada_alt_bu_2013	AT5G24710
1800	5	8466461	ada_alt_bu_2013	AT5G24710
1801	5	8466622	ada_alt_bu_2013	AT5G24710
1802	5	8467867	ada_alt_bu_2013	AT5G24710
1803	5	8466804	ada_alt_bu_2013	AT5G24710
1804	5	8467094	ada_alt_bu_2013	AT5G24710
1805	5	8470454	ada_alt_bu_2013	AT5G24740
1806	5	8473259	ada_alt_bu_2013	AT5G24740
1807	5	8475557	ada_alt_bu_2013	AT5G24740
1808	5	8475731	ada_alt_bu_2013	AT5G24740
1809	5	8475662	ada_alt_bu_2013	AT5G24740
1810	5	8476104	ada_alt_bu_2013	AT5G24740
1811	5	8477863	ada_alt_bu_2013	AT5G24740
1812	5	8476988	ada_alt_bu_2013	AT5G24740
1813	5	8478610	ada_alt_bu_2013	AT5G24740
1814	5	8479428	ada_alt_bu_2013	AT5G24740
1815	5	8479672	ada_alt_bu_2013	AT5G24740
1816	5	8481995	ada_alt_bu_2013	AT5G24740
1817	5	8480165	ada_alt_bu_2013	AT5G24740
1818	5	8480479	ada_alt_bu_2013	AT5G24740
1819	5	8480809	ada_alt_bu_2013	AT5G24740
1820	5	8482631	ada_alt_bu_2013	AT5G24740
1821	5	8485277	ada_alt_bu_2013	AT5G24740
1822	5	8483679	ada_alt_bu_2013	AT5G24740
1823	5	8485660	ada_alt_bu_2013	AT5G24740
1824	5	8486143	ada_alt_bu_2013	AT5G24740
1825	5	8485948	ada_alt_bu_2013	AT5G24740
1826	5	8486402	ada_alt_bu_2013	AT5G24740
1827	5	8487048	ada_alt_bu_2013	AT5G24740
1828	5	8487161	ada_alt_bu_2013	AT5G24740
1829	5	8487783	ada_alt_bu_2013	AT5G24740
1830	5	8487559	ada_alt_bu_2013	AT5G24740
1831	5	8488716	ada_alt_bu_2013	AT5G24740
1832	5	8467989	ada_alt_bu_2013	AT5G24710
1833	5	8489039	ada_alt_bu_2013	AT5G24740
1834	5	8489495	ada_alt_bu_2013	AT5G24740
1835	1	11954794	ada_alt_eu_2013	AT1G32980
1836	2	11157470	ada_alt_eu_2013	AT2G26210
1837	2	11407035	ada_alt_eu_2013	SCAB1
1838	3	11981835	ada_alt_eu_2013	-
1839	3	13535433	ada_alt_eu_2013	AT3G32990
1840	4	17388267	ada_alt_eu_2013	-
1841	4	17393784	ada_alt_eu_2013	AT4G09405
1842	5	1409589	ada_alt_eu_2013	VPS60.2
1843	5	2105367	ada_alt_eu_2013	AT5G06800
1844	5	17525152	ada_alt_eu_2013	-
1845	1	11954820	ada_alt_eu_2013	AT1G32980
1846	5	2105437	ada_alt_eu_2013	AT5G06800
1760	2	8151691	ada_alt_pu_2013	AT2G18820
1709	2	8663344	ada_alt_pu_2013	AT2G20080
1761	2	10571359	ada_alt_pu_2013	AT2G24800
1762	2	15532117	ada_alt_pu_2013	AT2G36980
1713	2	15534688	ada_alt_pu_2013	-
1714	2	16045762	ada_alt_pu_2013	AT2G38300
1715	2	16050863	ada_alt_pu_2013	PYL4
1755	2	16726070	ada_alt_pu_2013	-
1717	2	18290468	ada_alt_pu_2013	AT2G44240
1763	3	5277115	ada_alt_pu_2013	AT3G15590
1764	3	5311412	ada_alt_pu_2013	-
1765	3	5325842	ada_alt_pu_2013	AT3G15720
1766	3	5342097	ada_alt_pu_2013	AT3G15780
1767	3	5341978	ada_alt_pu_2013	AT3G15780
1768	3	5344841	ada_alt_pu_2013	-
1769	3	5364963	ada_alt_pu_2013	WSIP2
1770	3	5381734	ada_alt_pu_2013	AT3G15909
1771	3	5386599	ada_alt_pu_2013	AT3G15920
1718	3	5631875	ada_alt_pu_2013	DEG12
1722	3	9018311	ada_alt_pu_2013	-
1723	3	9019245	ada_alt_pu_2013	-
1773	4	2260101	ada_alt_pu_2013	CRK39
1732	4	6515861	ada_alt_pu_2013	-
1774	4	6519109	ada_alt_pu_2013	AT4G10550
1733	4	6519182	ada_alt_pu_2013	AT4G10550
1847	4	6663008	ada_alt_pu_2013	AT4G10843
112	4	17387096	ada_alt_pu_2013	-
1737	5	4573227	ada_alt_pu_2013	MPL1
1738	5	6576354	ada_alt_pu_2013	AT5G19485
1739	5	8448862	ada_alt_pu_2013	EMB2820
1740	5	8614387	ada_alt_pu_2013	-
1744	5	11403826	ada_alt_pu_2013	-
1848	5	19046285	ada_alt_pu_2013	-
1747	2	8664760	ada_alt_pu_2013	AT2G20080
1776	2	10571372	ada_alt_pu_2013	AT2G24800
1748	2	16050894	ada_alt_pu_2013	PYL4
1777	3	5346161	ada_alt_pu_2013	AT3G15800
1778	3	5388115	ada_alt_pu_2013	AT3G15920
1749	3	9024431	ada_alt_pu_2013	-
1750	4	6516821	ada_alt_pu_2013	AT4G10550
1849	1	17098082	ada_anta_con_2013	-
1850	3	16192787	ada_anta_con_2013	-
1851	4	3780759	ada_anta_con_2013	-
1852	5	9915537	ada_anta_con_2013	AT5G27900
1853	5	10299686	ada_anta_con_2013	-
1849	1	17098082	ada_anta_cu_2013	-
1854	3	11024509	ada_anta_cu_2013	AT3G29033
1852	5	9915537	ada_anta_cu_2013	AT5G27900
1849	1	17098082	ada_anta_bu_2013	-
1855	1	22029752	ada_anta_bu_2013	AT1G59850
1854	3	11024509	ada_anta_bu_2013	AT3G29033
1851	4	3780759	ada_anta_bu_2013	-
1852	5	9915537	ada_anta_bu_2013	AT5G27900
1849	1	17098082	ada_anta_eu_2013	-
1851	4	3780759	ada_anta_eu_2013	-
1852	5	9915537	ada_anta_eu_2013	AT5G27900
1853	5	10299686	ada_anta_eu_2013	-
1856	2	2919987	ada_anta_gu_2013	AT2G07042
1854	3	11024509	ada_anta_gu_2013	AT3G29033
1852	5	9915537	ada_anta_gu_2013	AT5G27900
1849	1	17098082	ada_anta_pu_2013	-
1855	1	22029752	ada_anta_pu_2013	AT1G59850
1854	3	11024509	ada_anta_pu_2013	AT3G29033
1851	4	3780759	ada_anta_pu_2013	-
1852	5	9915537	ada_anta_pu_2013	AT5G27900
1857	3	1068505	ada_mutu_con_2013	APY1
1858	3	11045845	ada_mutu_con_2013	AT3G29060
1859	3	11046189	ada_mutu_con_2013	AT3G29060
1860	5	19780046	ada_mutu_con_2013	AT5G48790
1861	5	19775043	ada_mutu_con_2013	AT5G48775
1862	5	19777352	ada_mutu_con_2013	-
1863	5	19779299	ada_mutu_con_2013	AT5G48780
1864	5	19780465	ada_mutu_con_2013	AT5G48790
1865	5	19781572	ada_mutu_con_2013	AT5G48790
1866	5	19780705	ada_mutu_con_2013	AT5G48790
1867	5	19780972	ada_mutu_con_2013	AT5G48790
1868	5	19781176	ada_mutu_con_2013	AT5G48790
1869	3	11046254	ada_mutu_con_2013	AT3G29060
1870	5	19781649	ada_mutu_con_2013	AT5G48790
1871	5	19783806	ada_mutu_con_2013	-
1872	2	7551978	ada_mutu_cu_2013	HMG2
1873	4	9601060	ada_mutu_cu_2013	-
1874	4	17817894	ada_mutu_cu_2013	-
1875	1	5922047	ada_mutu_bu_2013	-
1876	1	10235696	ada_mutu_bu_2013	-
1877	1	12977193	ada_mutu_bu_2013	-
1878	1	19800653	ada_mutu_bu_2013	DRP5A
1879	1	19802778	ada_mutu_bu_2013	-
1880	1	24198579	ada_mutu_bu_2013	AT1G65130
1881	1	25040847	ada_mutu_bu_2013	-
1882	1	26794882	ada_mutu_bu_2013	-
1883	2	7131429	ada_mutu_bu_2013	AT2G16450
1884	2	7132948	ada_mutu_bu_2013	-
1885	2	7134738	ada_mutu_bu_2013	AT2G16460
1886	2	7135439	ada_mutu_bu_2013	AT2G16460
1887	2	7434918	ada_mutu_bu_2013	SSP
1888	2	11469813	ada_mutu_bu_2013	GRV2
1889	2	17307563	ada_mutu_bu_2013	-
1890	3	49564	ada_mutu_bu_2013	-
1891	3	53760	ada_mutu_bu_2013	PTB1
1892	3	54878	ada_mutu_bu_2013	AT3G01160
1893	3	65810	ada_mutu_bu_2013	SS2
1894	3	105831	ada_mutu_bu_2013	AT3G00990
1857	3	1068505	ada_mutu_bu_2013	APY1
1895	3	6079343	ada_mutu_bu_2013	GAD5
1896	3	8008315	ada_mutu_bu_2013	-
1897	4	787781	ada_mutu_bu_2013	ABCB5
1898	4	14362085	ada_mutu_bu_2013	-
1899	5	3014238	ada_mutu_bu_2013	AT5G09720
1900	5	5287949	ada_mutu_bu_2013	-
1901	5	8344272	ada_mutu_bu_2013	-
1902	5	16919135	ada_mutu_bu_2013	AT5G42320
1903	5	19141082	ada_mutu_bu_2013	AT5G47130
1904	5	21601214	ada_mutu_bu_2013	-
1905	3	8879596	ada_mutu_eu_2013	-
1906	4	6603408	ada_mutu_eu_2013	SPT16
1864	5	19780465	ada_mutu_eu_2013	AT5G48790
1862	5	19777352	ada_mutu_eu_2013	-
1860	5	19780046	ada_mutu_eu_2013	AT5G48790
1866	5	19780705	ada_mutu_eu_2013	AT5G48790
1867	5	19780972	ada_mutu_eu_2013	AT5G48790
1868	5	19781176	ada_mutu_eu_2013	AT5G48790
1865	5	19781572	ada_mutu_eu_2013	AT5G48790
1870	5	19781649	ada_mutu_eu_2013	AT5G48790
1871	5	19783806	ada_mutu_eu_2013	-
1857	3	1068505	ada_mutu_gu_2013	APY1
1907	3	5959510	ada_mutu_gu_2013	GPK1
1908	5	10823588	ada_mutu_gu_2013	AT5G28810
1909	3	5961332	ada_mutu_gu_2013	GPK1
1910	1	3883435	ada_mutu_pu_2013	NTL
1911	1	27369935	ada_mutu_pu_2013	AT1G72700
1872	2	7551978	ada_mutu_pu_2013	HMG2
1873	4	9601060	ada_mutu_pu_2013	-
1874	4	17817894	ada_mutu_pu_2013	-
